# Supplementary material
Source: MDPI journal article supplement (https://www.mdpi.com/2073-4395/10/10/1456)
Supplement: s1 [file s1]

# Supplementary materials

## $2^{5-2}_{III}$ fractional factorial design

**Table S1.** Control factors and level settings for substratum optimization.

|   | Control factor                   | Low (-1)       | High (+1)           |
|---|----------------------------------|----------------|---------------------|
| A | Peat                             | Black peat     | White peat          |
| B | Other organics                   | Coir pith      | Wood fiber          |
| C | Composted materials              | Composted bark | Green waste compost |
| D | Inorganic materials              | Perlite        | Sand                |
| E | Arabic gum (kg.m <sup>-3</sup> ) | 1              | 5                   |
| F | Inoculum                         | C              | S1-5                |

**Table S2.** The  $2^{5-2}_{III}$  fractional factorial design extended with a sixth control factor F, bacterial community inoculums S1-5 compared to negative control C. The basic  $2^{5-2}_{III}$  fractional factorial design is highlighted in gray.

| Treatment | Control factors |    |    |    |    |    |
|-----------|-----------------|----|----|----|----|----|
|           | A               | B  | C  | D  | E  | F  |
| S-M1      | 1               | -1 | -1 | -1 | -1 | 1  |
| S-M3      | -1              | -1 | -1 | 1  | 1  | 1  |
| S-M4      | 1               | -1 | 1  | -1 | 1  | 1  |
| S-M5      | 1               | 1  | -1 | 1  | -1 | 1  |
| S-M7      | -1              | 1  | -1 | -1 | 1  | 1  |
| S-M8      | -1              | -1 | 1  | 1  | -1 | 1  |
| S-M9      | 1               | 1  | 1  | 1  | 1  | 1  |
| S-M10     | -1              | 1  | 1  | -1 | -1 | 1  |
| C-M1      | 1               | -1 | -1 | -1 | -1 | -1 |
| C-M3      | -1              | -1 | -1 | 1  | 1  | -1 |
| C-M4      | 1               | -1 | 1  | -1 | 1  | -1 |
| C-M5      | 1               | 1  | -1 | 1  | -1 | -1 |
| C-M7      | -1              | 1  | -1 | -1 | 1  | -1 |
| C-M8      | -1              | -1 | 1  | 1  | -1 | -1 |
| C-M9      | 1               | 1  | 1  | 1  | 1  | -1 |
| C-M10     | -1              | 1  | 1  | -1 | -1 | -1 |

## 9 Physicochemical properties of substrata

**Table S3.** Physicochemical properties of the experimental substrata (M1–10) and the commercial substratum (control M). Chemical properties: pH, EC ( $\mu\text{S}\cdot\text{cm}^{-1}$ ) and  $\text{NO}_3^-$ ,  $\text{NH}_4^+$ ,  $\text{P}_2\text{O}_5$ ,  $\text{K}^+$ ,  $\text{Ca}^{2+}$ ,  $\text{Mg}^{2+}$ ,  $\text{SO}_4^{2-}$ ,  $\text{Na}^+$ ,  $\text{Cl}^-$ ,  $\text{Fe}^{2+}$ , and  $\text{Mn}^{2+}$  concentrations ( $\text{mg}\cdot\text{L}^{-1}$  substratum). Physical properties: dry matter content (DM; % FW), organic matter content (OM; % DW), ash content (% DW), bulk density ( $\rho_b$ ;  $\text{g}\cdot\text{L}^{-1}$ ), shrinkage (% v/v), water capacity (WC;  $\text{g}\cdot(100\text{ g dry matter})^{-1}$ ), air volume at water saturation point ( $V_a$ ; % v/v), water volume at water saturation point ( $V_w$ ; % v/v), total pore volume (TPV; % v/v), and water-filled porosity at water saturation point (WFP; % v/v). Letters show comparison of means per property. bdl = below detection limit.

| Chemical               | M1                     | M2                      | M3                       | M4                       | M5                      | M6                      | M7                      | M8                      | M9                      | M10                      | Control M               |
|------------------------|------------------------|-------------------------|--------------------------|--------------------------|-------------------------|-------------------------|-------------------------|-------------------------|-------------------------|--------------------------|-------------------------|
| pH                     | 6.62g<br>$\pm 0.04$    | 6.23d<br>$\pm 0.02$     | 5.94c<br>$\pm 0.02$      | 6.31de<br>$\pm 0.03$     | 6.52fg<br>$\pm 0.06$    | 6.40ef<br>$\pm 0.17$    | 5.73b<br>$\pm 0.05$     | 5.54a<br>$\pm 0.03$     | 6.29de<br>$\pm 0.04$    | 5.73b<br>$\pm 0.01$      | 5.88bc<br>$\pm 0$       |
| EC                     | 51.53a<br>$\pm 1.95$   | 72.43ab<br>$\pm 9.87$   | 207e<br>$\pm 10.15$      | 130.33c<br>$\pm 3.06$    | 51.47a<br>$\pm 1.42$    | 76.87b<br>$\pm 6.52$    | 193.33e<br>$\pm 6.11$   | 275.33f<br>$\pm 9.71$   | 170d<br>$\pm 10.39$     | 268f<br>$\pm 6.24$       | 310g<br>$\pm 11.27$     |
| $\text{NO}_3^-$        | bdl                    | bdl                     | bdl                      | bdl                      | bdl                     | bdl                     | bdl                     | bdl                     | bdl                     | bdl                      | 41.81<br>$\pm 5.87$     |
| $\text{NH}_4^+$        | 1.89a<br>$\pm 1.81$    | 1.50a<br>$\pm 1.17$     | 1.53a<br>$\pm 0.63$      | 0.47a<br>$\pm 0.08$      | 0.75a<br>$\pm 0.05$     | 0.75a<br>$\pm 0.24$     | 1.32a<br>$\pm 0.08$     | 1.30a<br>$\pm 0.16$     | 0.83a<br>$\pm 0.44$     | 1.27a<br>$\pm 0.31$      | 49.02b<br>$\pm 1.40$    |
| $\text{P}_2\text{O}_5$ | 12.75abc<br>$\pm 2.04$ | 22.47cd<br>$\pm 4.17$   | 5a<br>$\pm 0.71$         | 46.65e<br>$\pm 8.31$     | 19.72bcd<br>$\pm 2.01$  | 20.25bcd<br>$\pm 3.30$  | 8.17ab<br>$\pm 3.08$    | 19.13bcd<br>$\pm 1.95$  | 56.85e<br>$\pm 7.82$    | 26.3d<br>$\pm 4.58$      | 51.88e<br>$\pm 0.45$    |
| $\text{K}^+$           | 86.88ab<br>$\pm 0.93$  | 110.85bc<br>$\pm 8.30$  | 103abc<br>$\pm 10.01$    | 271.57e<br>$\pm 12.77$   | 84.72a<br>$\pm 3.53$    | 122.62c<br>$\pm 3.53$   | 94.5ab<br>$\pm 5.77$    | 255.83e<br>$\pm 5.67$   | 335.53f<br>$\pm 15.37$  | 281.75e<br>$\pm 14.40$   | 220.48d<br>$\pm 2.64$   |
| $\text{Ca}^{2+}$       | 1113.5a<br>$\pm 32.63$ | 1016.8a<br>$\pm 35.48$  | 1700.62b<br>$\pm 219.95$ | 1191.22a<br>$\pm 153.94$ | 981.07a<br>$\pm 49.34$  | 1148.72a<br>$\pm 38.03$ | 1617.18b<br>$\pm 48.74$ | 1529.57b<br>$\pm 43.71$ | 1191.1a<br>$\pm 74.55$  | 1648.12b<br>$\pm 111.69$ | 1687.90b<br>$\pm 35.53$ |
| $\text{Mg}^{2+}$       | 200.28b<br>$\pm 6.35$  | 206.33b<br>$\pm 7.85$   | 268.58d<br>$\pm 29.42$   | 223.62bc<br>$\pm 11.34$  | 203.65b<br>$\pm 6.33$   | 223.52bc<br>$\pm 6.52$  | 252.35cd<br>$\pm 6.08$  | 199.03b<br>$\pm 7.98$   | 230.30bc<br>$\pm 10.32$ | 235.17bcd<br>$\pm 18.90$ | 132.37a<br>$\pm 2.03$   |
| $\text{SO}_4^{2-}$     | 94.73a<br>$\pm 2.12$   | 155.17ab<br>$\pm 51.85$ | 367.93c<br>$\pm 30.36$   | 177.33b<br>$\pm 1.72$    | 131.03ab<br>$\pm 23.44$ | 149.60ab<br>$\pm 12.18$ | 371.30c<br>$\pm 16.23$  | 376.57c<br>$\pm 5.71$   | 192.53b<br>$\pm 19.81$  | 389.10c<br>$\pm 17.50$   | 181.70b<br>$\pm 6.66$   |
| $\text{Na}^+$          | 30.43a<br>$\pm 0.45$   | 29.30a<br>$\pm 1.56$    | 35.95ab<br>$\pm 5.19$    | 44.78c<br>$\pm 1.63$     | 28.95a<br>$\pm 3.13$    | 30.57a<br>$\pm 0.40$    | 35.78ab<br>$\pm 4.03$   | 40.02bc<br>$\pm 3.06$   | 46.72c<br>$\pm 4.21$    | 48.37c<br>$\pm 2.23$     | 42.77bc<br>$\pm 0.98$   |
| $\text{Cl}^-$          | 36.23ab<br>$\pm 2.03$  | 42.27b<br>$\pm 8.18$    | 37.57ab<br>$\pm 3.71$    | 99.47e<br>$\pm 2.08$     | 43.30b<br>$\pm 5.14$    | 44.53b<br>$\pm 5.65$    | 27.23a<br>$\pm 2.25$    | 84.83d<br>$\pm 1.14$    | 115.37f<br>$\pm 3.93$   | 89.33de<br>$\pm 0.76$    | 64.40c<br>$\pm 1.31$    |

|                  |                    |                   |                    |                    |                    |                    |                   |                    |                    |                   |                    |
|------------------|--------------------|-------------------|--------------------|--------------------|--------------------|--------------------|-------------------|--------------------|--------------------|-------------------|--------------------|
| Fe <sup>2+</sup> | 0.75bc<br>± 0.09   | 1.05cd<br>± 0.09  | 0.35a<br>± 0.05    | 1.08cd<br>± 0.08   | 0.90cd<br>± 0      | 1.13d<br>± 0.16    | 0.38a<br>± 0.03   | 0.32a<br>± 0.08    | 1.70e<br>± 0.26    | 0.52ab<br>± 0.18  | 1.07cd<br>± 0.08   |
| Mn <sup>2+</sup> | 5.53bcd<br>± 0.08  | 10.33h<br>± 0.55  | 5.27bc<br>± 0.95   | 5.02bc<br>± 0.38   | 9.03gh<br>± 0.31   | 6.23cde<br>± 0.10  | 8.43fg<br>± 0.28  | 4.72b<br>± 0.43    | 7.40ef<br>± 0.30   | 6.72de<br>± 0.88  | 2.40a<br>± 0       |
| <b>Physical</b>  |                    |                   |                    |                    |                    |                    |                   |                    |                    |                   |                    |
| DM               | 38b<br>± 0         | 50cde<br>± 0      | 46.67bcd<br>± 0.58 | 41.33bc<br>± 0.58  | 66.67f<br>± 0.58   | 58ef<br>± 0        | 38b<br>± 0        | 52.33de<br>± 10.12 | 65f<br>± 0         | 40.67b<br>± 0.58  | 22.33a<br>± 0.58   |
| OM               | 81.67ef<br>± 1.15  | 82ef<br>± 1.73    | 45bc<br>± 1.73     | 64d<br>± 1         | 33.33a<br>± 0.58   | 37ab<br>± 1.73     | 78.33e<br>± 0.58  | 47.33c<br>± 9.24   | 30a<br>± 1.73      | 65.67d<br>± 1.53  | 90f<br>± 0         |
| Ash              | 18.33ab<br>± 1.15  | 18ab<br>± 1.73    | 55de<br>± 1.73     | 36c<br>± 1         | 66.67f<br>± 0.58   | 63ef<br>± 1.73     | 21.67b<br>± 0.58  | 52.67d<br>± 9.24   | 70f<br>± 1.73      | 34.33c<br>± 1.53  | 10a<br>± 0         |
| Q <sub>b</sub>   | 93.33a<br>± 1.15   | 95.33ab<br>± 1.53 | 274.33g<br>± 1.15  | 106.67b<br>± 3.51  | 222e<br>± 3.46     | 214e<br>± 1.73     | 159c<br>± 1       | 279.67g<br>± 1.53  | 250.67f<br>± 11.37 | 183d<br>± 1.73    | 99.33ab<br>± 0.58  |
| Shrinkage        | 25.33ab<br>± 0.58  | 24.67a<br>± 3.79  | 32c<br>± 0         | 29.33abc<br>± 3.06 | 24a<br>± 3.46      | 27.67abc<br>± 2.31 | 28abc<br>± 1.73   | 31.33bc<br>± 1.15  | 29abc<br>± 1       | 26abc<br>± 1.73   | 27.33abc<br>± 1.53 |
| WC               | 769.33g<br>± 13.58 | 714f<br>± 16.52   | 267a<br>± 1        | 673e<br>± 14.93    | 315.33b<br>± 2.31  | 327b<br>± 1.73     | 463.33d<br>± 9.81 | 257.67a<br>± 4.04  | 267a<br>± 9.54     | 402.33c<br>± 3.79 | 805h<br>± 4.36     |
| V <sub>a</sub>   | 22.67f<br>± 0.58   | 26.33g<br>± 1.53  | 13a<br>± 0         | 22ef<br>± 1        | 19.33cd<br>± 0.58  | 20de<br>± 0        | 17bc<br>± 1       | 13.33a<br>± 0.58   | 21.33def<br>± 1.53 | 16b<br>± 0        | 11.33a<br>± 0.58   |
| V <sub>w</sub>   | 72cd<br>± 0        | 68ab<br>± 1.73    | 73.33d<br>± 0.58   | 72cd<br>± 1        | 69.67abc<br>± 0.58 | 70bc<br>± 0        | 73.67d<br>± 1.53  | 72.33cd<br>± 0.58  | 67a<br>± 1         | 74d<br>± 0        | 83e<br>± 1         |
| TPV              | 94d<br>± 0         | 94d<br>± 0        | 86a<br>± 0         | 94d<br>± 0         | 89.33bc<br>± 0.58  | 90c<br>± 0         | 90c<br>± 0        | 85.67a<br>± 0.58   | 88.33b<br>± 0.58   | 89.67c<br>± 0.58  | 95d<br>± 0         |
| WFP              | 76.60b<br>± 0      | 72.34a<br>± 1.84  | 85.27de<br>± 0.67  | 76.60b<br>± 1.06   | 77.99b<br>± 1.15   | 77.78b<br>± 0      | 81.85c<br>± 1.70  | 84.44cde<br>± 0.63 | 75.85b<br>± 1.58   | 82.53cd<br>± 0.53 | 87.37e<br>± 1.05   |

16 Effect of bacterial community inoculum and substratum on shoot fresh weight

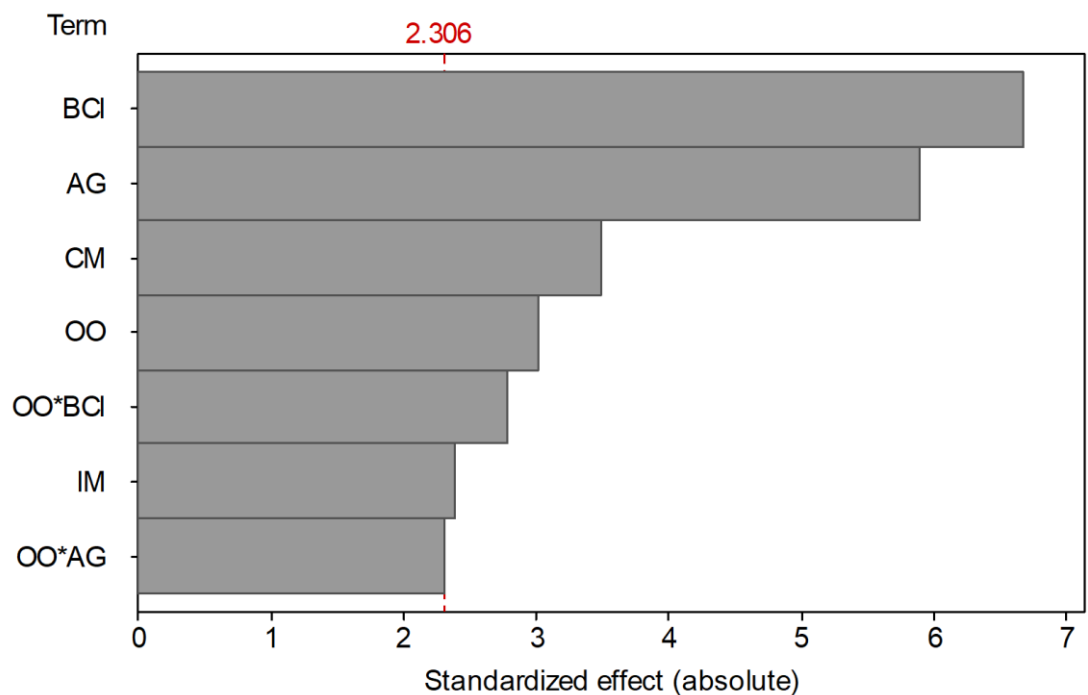

**Figure S1.** Pareto chart of the standardized effect (absolute) of the significant terms on shoot fresh weight (FW) under BCI S3 treatment. Terms are ordered from the largest to the smallest effect: BCI S3, Arabic gum (AG), composted materials (CM), Other organics (OO), OO\*BCI interaction effect, inorganic materials (IM), and OO\*AG interaction effect. The dashed reference line indicates the statistical significance of effects. Significance at  $P < 0.05$ .

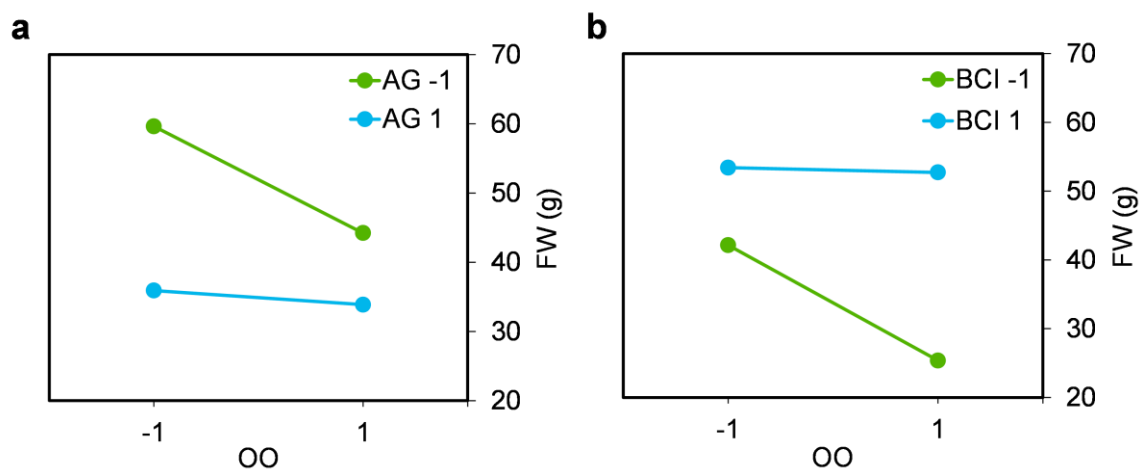

**Figure S2.** Interaction effects between substratum raw material groups on shoot fresh weight (FW; g) under BCI S3 treatment. (a) Other organics (OO; -1 = coir pith and 1 = wood fiber) and Arabic gum (AG; -1 = 1 kg.m<sup>-3</sup> and 1 = 5 kg.m<sup>-3</sup>) ( $P = 0.049$ ); (b) Other organics and BCI (-1 = C and 1 = S3) ( $P = 0.024$ ).

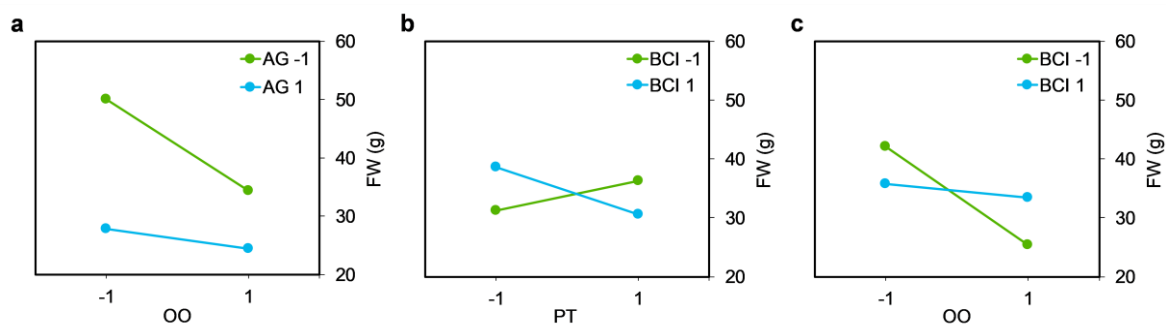

**Figure S3.** Interaction effects between substratum raw material groups on shoot fresh weight (FW; g) under BCI S5 treatment. (a) Other organics (OO; -1 = coir pith and 1 = wood fiber) and Arabic gum (AG; -1 = 1 kg.m<sup>-3</sup> and 1 = 5 kg.m<sup>-3</sup>) (P = 0.021); (b) Peat (PT; -1 = black peat and 1 = white peat) and BCI (-1 = C and 1 = S5) (P = 0.016); (c) Other organics and BCI (P = 0.011).

**Table S4.** Shoot fresh weight (FW; g) response optimization under each BCI treatment. Peat (PT; -1 = black peat and 1 = white peat), other organics (OO; -1 = coir pith and 1 = wood fiber), composted materials (CM; -1 = composted bark and 1 = green waste compost), inorganic materials (IM; -1 = perlite and 1 = sand), Arabic gum (AG; -1 = 1 kg.m<sup>-3</sup> and 1 = 5 kg.m<sup>-3</sup>), and bacterial inoculum (BCI; -1 = C and 1 = S1-5 or PGPR).

| BCI  | Goal   | Solution                                | Fit   | SE fit | 95 % CI        |
|------|--------|-----------------------------------------|-------|--------|----------------|
| PGPR | Max FW | BCI -1                                  | 33.76 | 4.43   | (24.26; 43.26) |
| S1   | Max FW | OO -1; CM 1; AG -1                      | 51.83 | 4.02   | (43.07; 60.59) |
| S2   | Max FW | OO -1; CM 1; AG -1                      | 47.74 | 4.73   | (37.44; 58.04) |
| S3   | Max FW | OO -1; CM 1; IM -1; AG -1; BCI 1        | 73.78 | 4.09   | (64.35; 83.21) |
| S4   | Max FW | CM 1; AG -1                             | 50.10 | 4.06   | (41.32; 58.88) |
| S5   | Max FW | PT 1; OO -1; CM 1; IM -1; AG -1; BCI -1 | 64.67 | 3.12   | (57.03; 72.31) |

39 Effect of bacterial community inoculum and substratum on lettuce head area

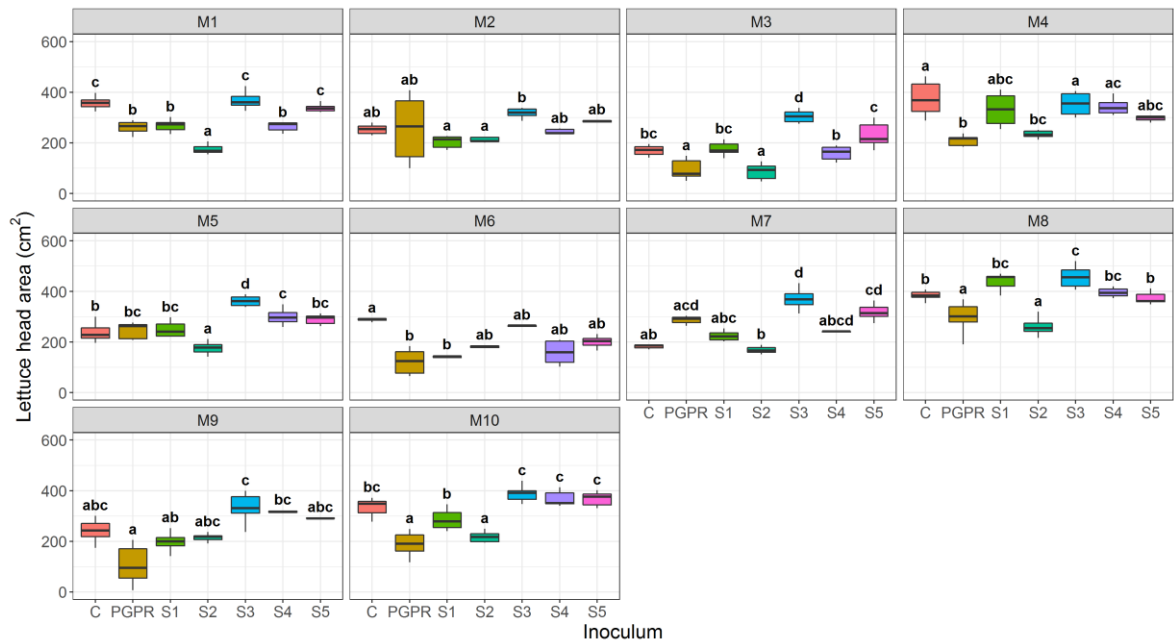

40  
41 **Figure S4.** Boxplot of lettuce head area (LHA; cm²) grouped per substratum. Letters show comparison  
42 of BCI means per plant growing medium at the 95 % confidence level. S indicates the bacterial  
43 community inoculum, M indicates the plant growing medium, C indicates the negative control  
44 treatment without addition of inoculum, and PGPR indicates the positive control treatment with a  
45 *Bacillus* sp. inoculum. Number of plants  $\geq 3$ .

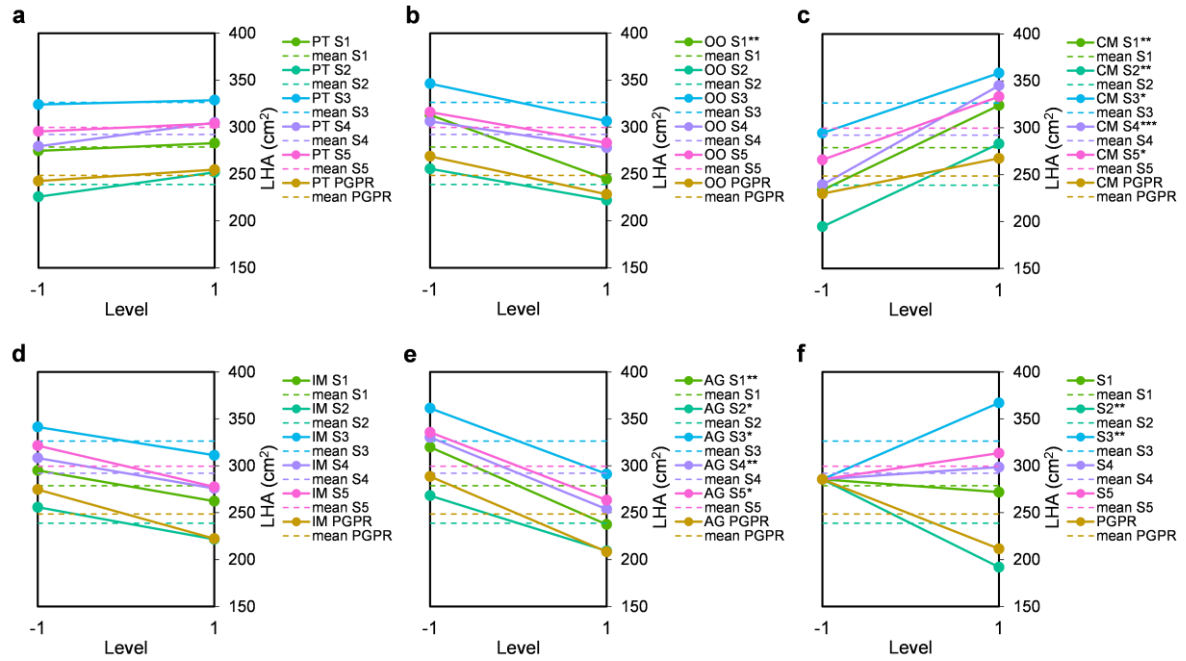

**Figure S5.** Main effects of substratum constituents on lettuce head area (LHA; cm<sup>2</sup>) under different bacterial treatments (S1–5 and positive control PGPR). (a) Peat (PT; -1 = black peat and 1 = white peat); (b) Other organics (OO; -1 = coir pith and 1 = wood fiber); (c) Composted materials (CM; -1 = composted bark and 1 = green waste compost); (d) Inorganic materials (IM; -1 = perlite and 1 = sand); (e) Arabic gum (AG; -1 = 1 kg.m<sup>-3</sup> and 1 = 5 kg.m<sup>-3</sup>); (f) Bacterial inoculum (BCI; -1 = C and 1 = S1–5 or PGPR). Dashed lines indicate mean levels of LHA for each bacterial treatment. Asterisks indicate level of significance: P < 0.05 (\*), P < 0.01 (\*\*) and P < 0.001 (\*\*\*).

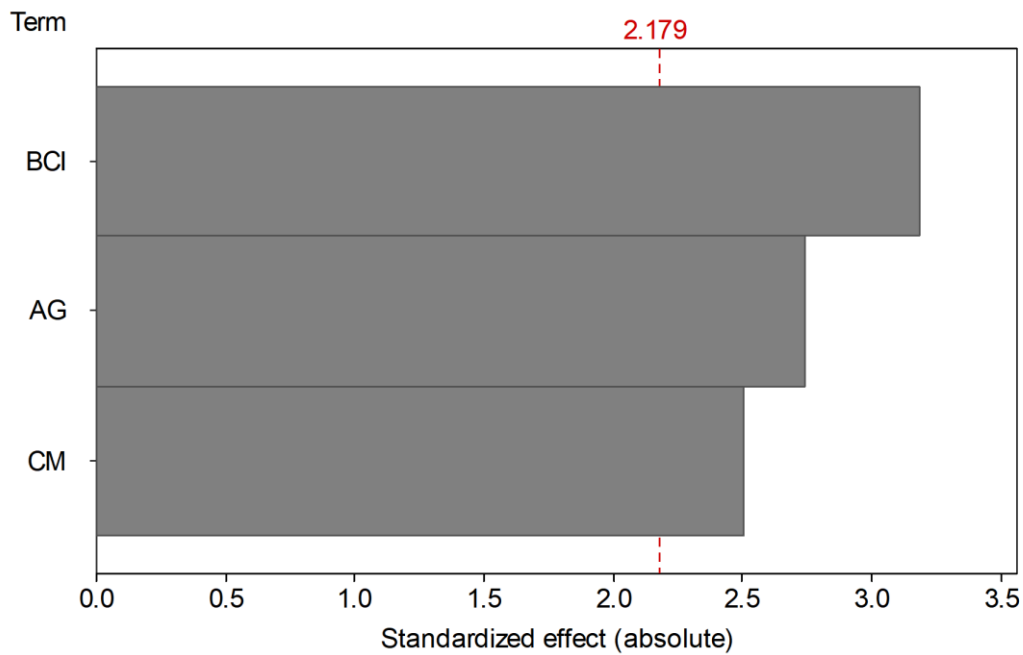

**Figure S6.** Pareto chart of the standardized effect (absolute) of the significant terms on lettuce head area (LHA) under BCI S3 treatment. Terms are ordered from the largest to the smallest effect: BCI S3, Arabic gum (AG), and composted materials (CM). The dashed reference line indicates the statistical significance of effects. Significance at  $P < 0.05$ .

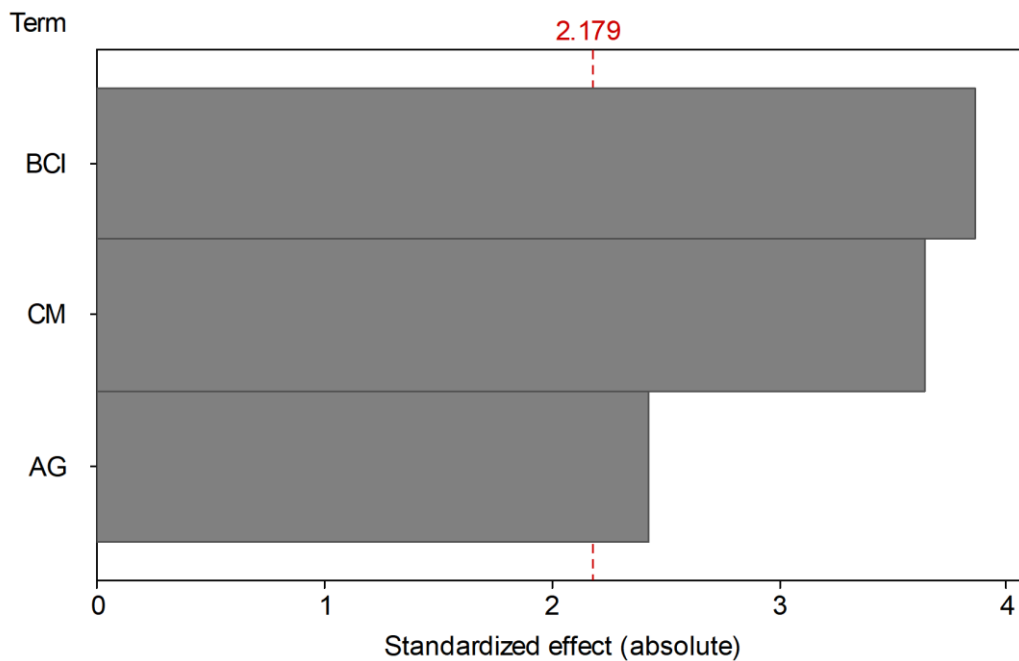

**Figure S7.** Pareto chart of the standardized effect (absolute) of the significant terms on lettuce head area (LHA) under BCI S2 treatment. Terms are ordered from the largest to the smallest effect: BCI S2, composted materials (CM), and Arabic gum (AG). The dashed reference line indicates the statistical significance of effects. Significance at  $P < 0.05$ .



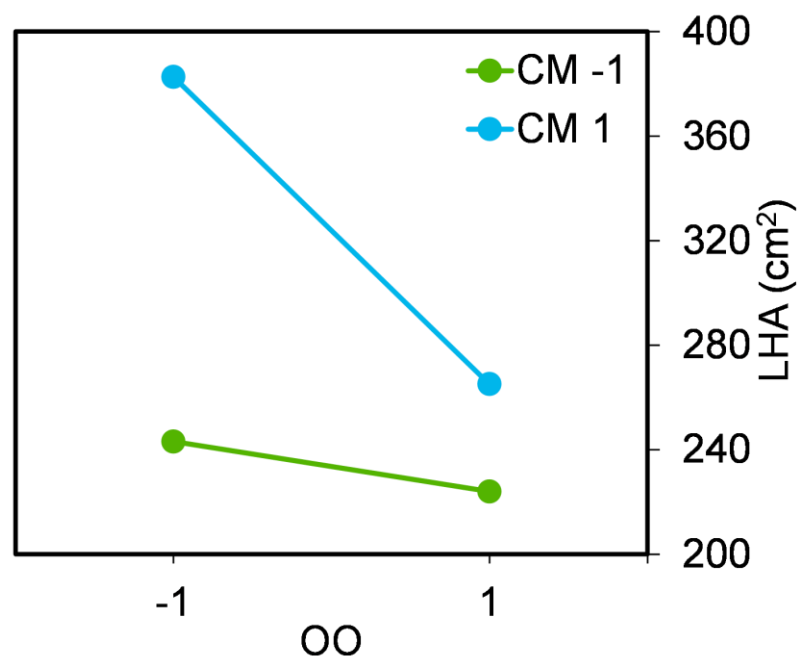

**Figure S8.** Interaction effect between other organics (OO; -1 = coir pith and 1 = wood fiber) and composted materials (CM; -1 = composted bark and 1 = green waste compost) on lettuce head area (LHA; cm<sup>2</sup>) under BCI S1 treatment (P = 0.023).

**Table S5.** Lettuce head area (LHA; cm<sup>2</sup>) response optimization under each BCI treatment. Peat (PT; -1 = black peat and 1 = white peat), other organics (OO; -1 = coir pith and 1 = wood fiber), composted materials (CM; -1 = composted bark and 1 = green waste compost), inorganic materials (IM; -1 = perlite and 1 = sand), Arabic gum (AG; -1 = 1 kg.m<sup>-3</sup> and 1 = 5 kg.m<sup>-3</sup>), and bacterial inoculum (BCI; -1 = C and 1 = S1-5 or PGPR). n.s. = no significant effect of any control factor.

| BCI  | Goal    | Solution                   | Fit   | SE fit | 95 % CI        |
|------|---------|----------------------------|-------|--------|----------------|
| PGPR | Max LHA | n.s.                       | /     | /      | /              |
| S1   | Max LHA | OO -1; CM 1; AG -1         | 423.9 | 20.9   | (378.0; 469.8) |
| S2   | Max LHA | CM 1; AG -1; BCI -1        | 359.2 | 24.3   | (306.3; 412.0) |
| S3   | Max LHA | CM 1; AG -1; BCI 1         | 434.1 | 25.6   | (378.4; 489.8) |
| S4   | Max LHA | OO -1; CM 1; AG -1; BCI -1 | 412.9 | 23.6   | (360.5; 465.4) |
| S5   | Max LHA | CM 1; AG -1                | 369.4 | 21.8   | (322.3; 416.4) |

Effect of bacterial community inoculum and substratum on root fresh weight

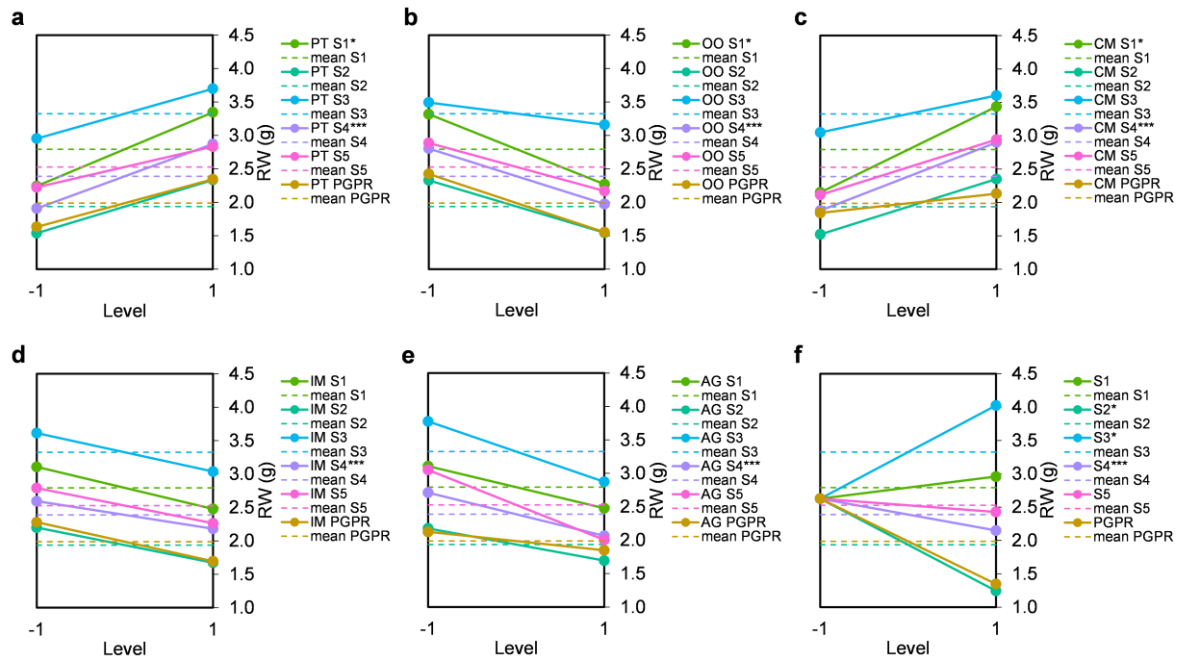

**Figure S9.** Main effects of substratum constituents on root fresh weight (RW; g) under different bacterial treatments (S1–5 and positive control PGPR). (a) Peat (PT; -1 = black peat and 1 = white peat); (b) Other organics (OO; -1 = coir pith and 1 = wood fiber); (c) Composted materials (CM; -1 = composted bark and 1 = green waste compost); (d) Inorganic materials (IM; -1 = perlite and 1 = sand); (e) Arabic gum (AG; -1 = 1 kg.m<sup>-3</sup> and 1 = 5 kg.m<sup>-3</sup>); (f) Bacterial inoculum (BCI; -1 = C and 1 = S1–5 or PGPR). Dashed lines indicate mean levels of RW for each bacterial treatment. Asterisks indicate level of significance: P < 0.05 (\*), P < 0.01 (\*\*) and P < 0.001 (\*\*\*).

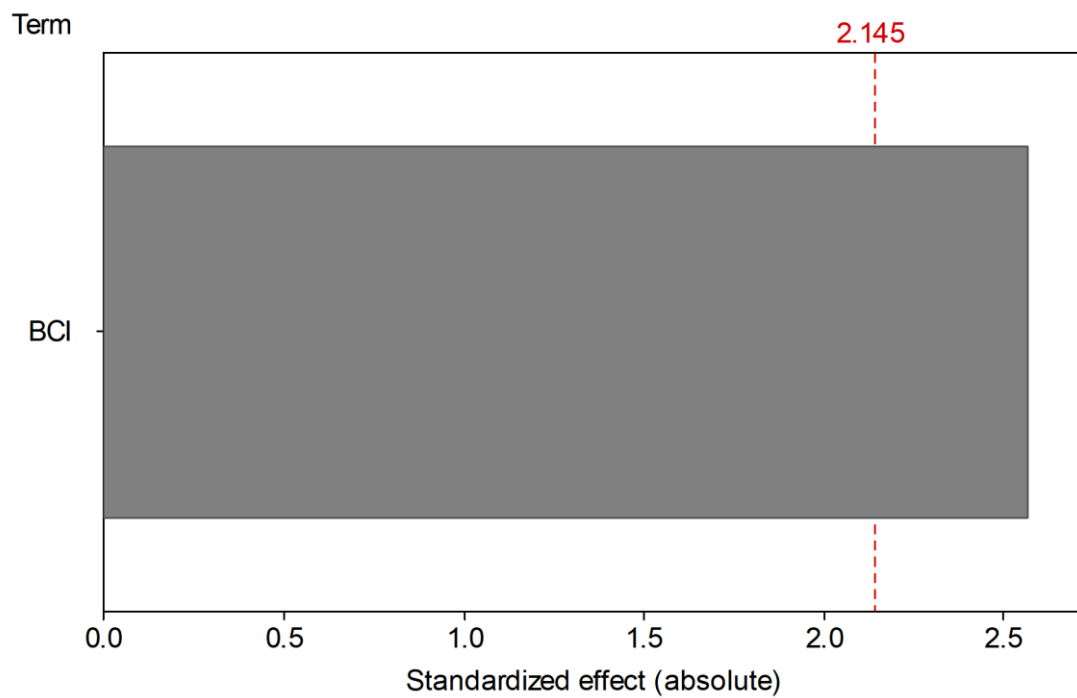

**Figure S10.** Pareto chart of the standardized effect (absolute) of the significant terms on root fresh weight (RW) under BCI S2 treatment. Terms are ordered from the largest to the smallest effect: BCI S2. The dashed reference line indicates the statistical significance of effects. Significance at  $P < 0.05$ .

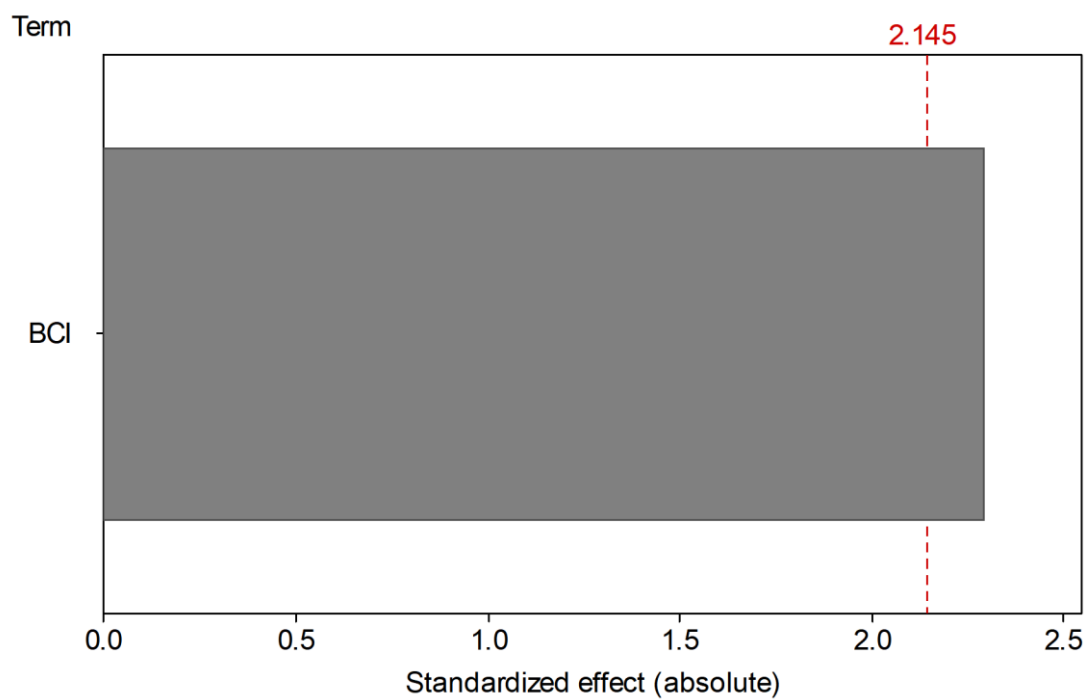

**Figure S11.** Pareto chart of the standardized effect (absolute) of the significant terms on root fresh weight (RW) under BCI S3 treatment. Terms are ordered from the largest to the smallest effect: BCI S3. The dashed reference line indicates the statistical significance of effects. Significance at  $P < 0.05$ .

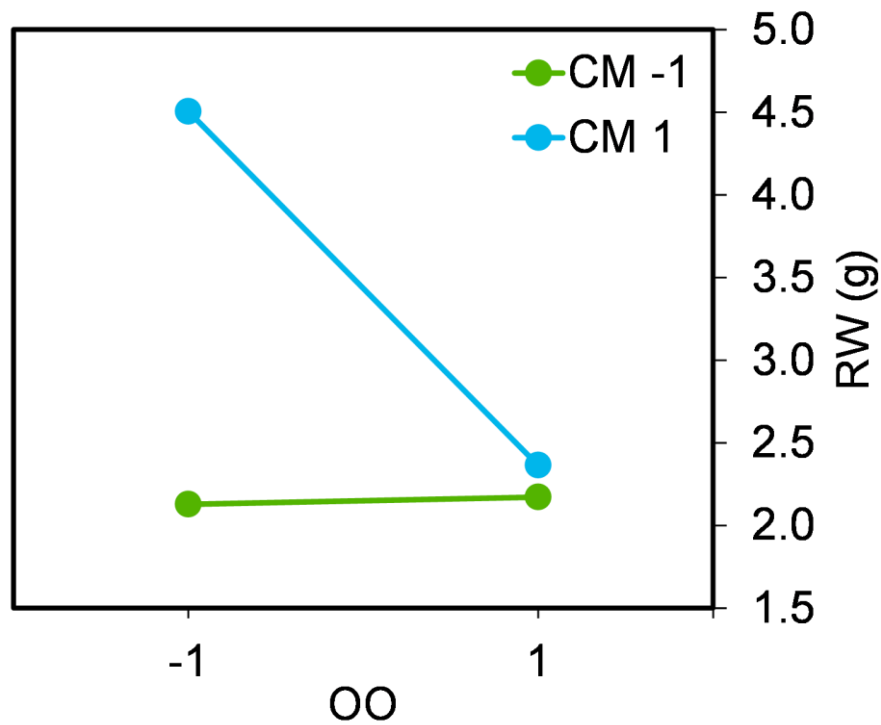

**Figure S12.** Interaction effect between other organics (OO; -1 = coir pith and 1 = wood fiber) and composted materials (CM; -1 = composted bark and 1 = green waste compost) on root fresh weight (RW; g) under BCI S1 treatment ( $P = 0.026$ ).

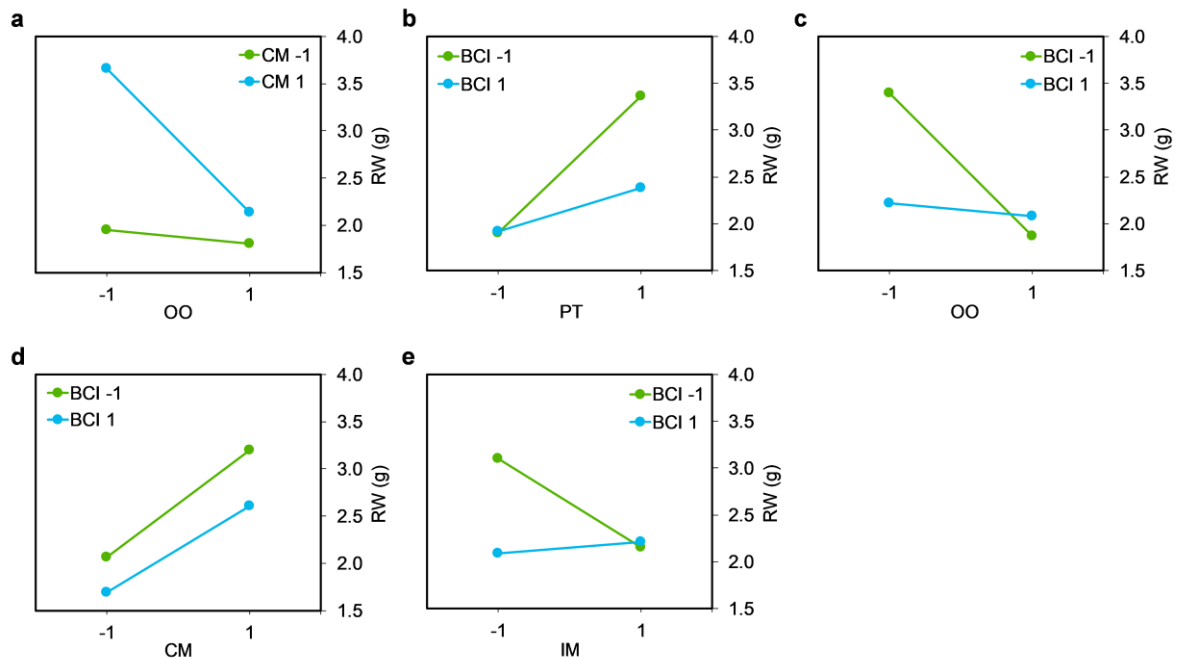

**Figure S13.** Interaction effects between substratum raw material groups on root fresh weight (RW; g) under BCI S4 treatment. (a) Other organics (OO; -1 = coir pith and 1 = wood fiber) and composted materials (CM; -1 = composted bark and 1 = green waste compost) ( $P < 0.001$ ); (b) Peat (PT; -1 = black peat and 1 = white peat) and BCI (-1 = C and 1 = S4) ( $P < 0.001$ ); (c) Other organics and BCI ( $P < 0.001$ ); (d) Composted materials and BCI ( $P = 0.044$ ); (e) Inorganic materials (IM; -1 = perlite and 1 = sand) and BCI ( $P < 0.001$ ).

**Table S6.** Root fresh weight (RW; g) response optimization under each BCI treatment. Peat (PT; -1 = black peat and 1 = white peat), other organics (OO; -1 = coir pith and 1 = wood fiber), composted materials (CM; -1 = composted bark and 1 = green waste compost), inorganic materials (IM; -1 = perlite and 1 = sand), Arabic gum (AG; -1 = 1 kg.m<sup>-3</sup> and 1 = 5 kg.m<sup>-3</sup>), and bacterial inoculum (BCI; -1 = C and 1 = S1-5 or PGPR). n.s. = no significant effect of any control factor.

| BCI  | Goal   | Solution                                | Fit  | SE fit | 95 % CI      |
|------|--------|-----------------------------------------|------|--------|--------------|
| PGPR | Max RW | n.s.                                    | /    | /      | /            |
| S1   | Max RW | PT 1; OO -1; CM 1                       | 5.06 | 0.48   | (4.01; 6.10) |
| S2   | Max RW | BCI -1                                  | 2.63 | 0.38   | (1.18; 3.45) |
| S3   | Max RW | BCI 1                                   | 4.02 | 0.43   | (3.10; 4.95) |
| S4   | Max RW | PT 1, OO -1, CM 1, IM -1, AG -1, BCI -1 | 5.83 | 0.07   | (5.65; 6.02) |
| S5   | Max RW | n.s.                                    | /    | /      | /            |

108      **Effect of bacterial community inoculum and substratum on shoot dry weight**

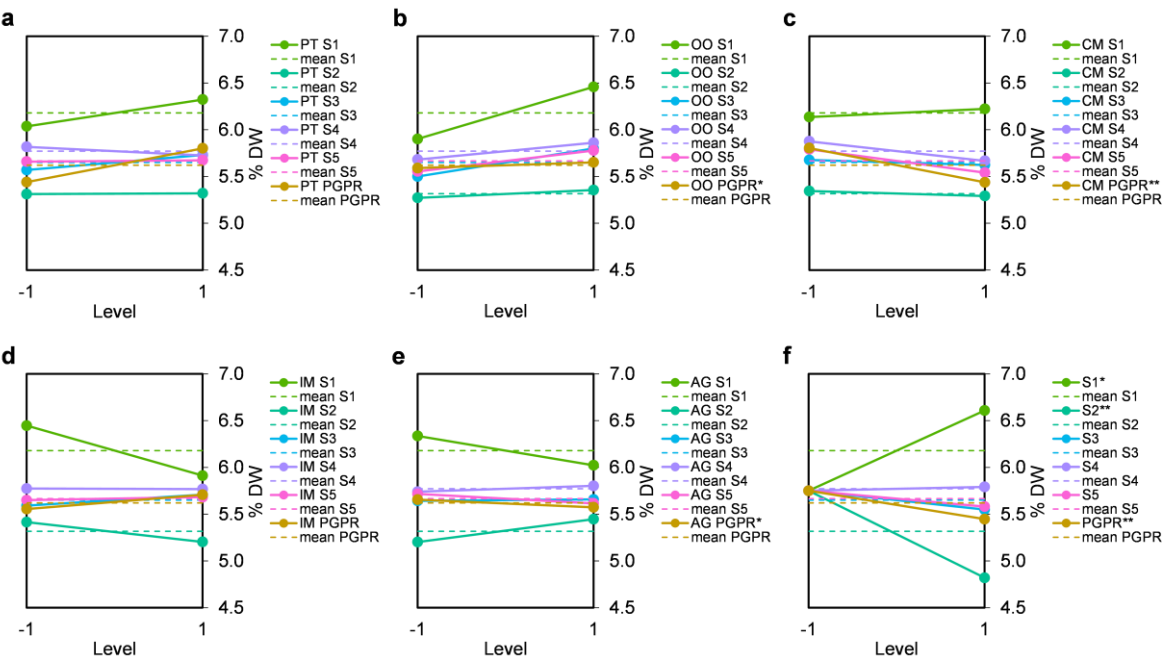

**Figure S14.** Main effects of substratum constituents on shoot dry weight (% DW) under different bacterial treatments (S1–5 and positive control PGPR). (a) Peat (PT; -1 = black peat and 1 = white peat); (b) Other organics (OO; -1 = coir pith and 1 = wood fiber); (c) Composted materials (CM; -1 = composted bark and 1 = green waste compost); (d) Inorganic materials (IM; -1 = perlite and 1 = sand); (e) Arabic gum (AG; -1 = 1 kg.m<sup>-3</sup> and 1 = 5 kg.m<sup>-3</sup>); (f) Bacterial inoculum (BCI; -1 = C and 1 = S1–5 or PGPR). Dashed lines indicate mean levels of DW for each bacterial treatment. Asterisks indicate level of significance: P < 0.05 (\*), P < 0.01 (\*\*) and P < 0.001 (\*\*\*).

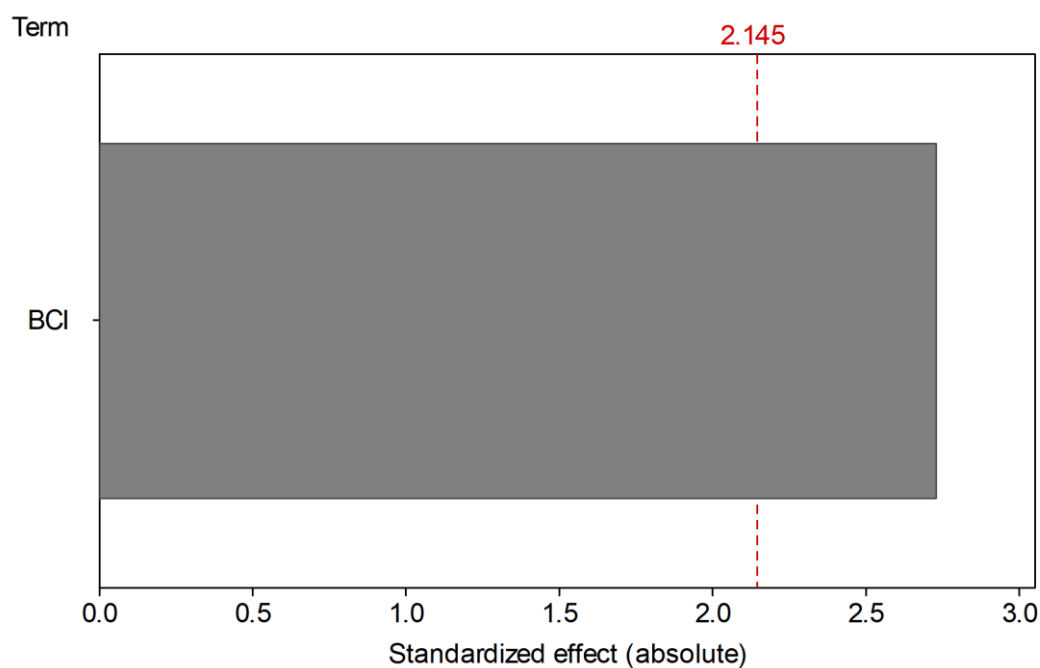

**Figure S15.** Pareto chart of the standardized effect (absolute) of the significant terms on shoot dry weight (DW) under BCI S1 treatment. Terms are ordered from the largest to the smallest effect: BCI S1. The dashed reference line indicates the statistical significance of effects. Significance at  $P < 0.05$ .

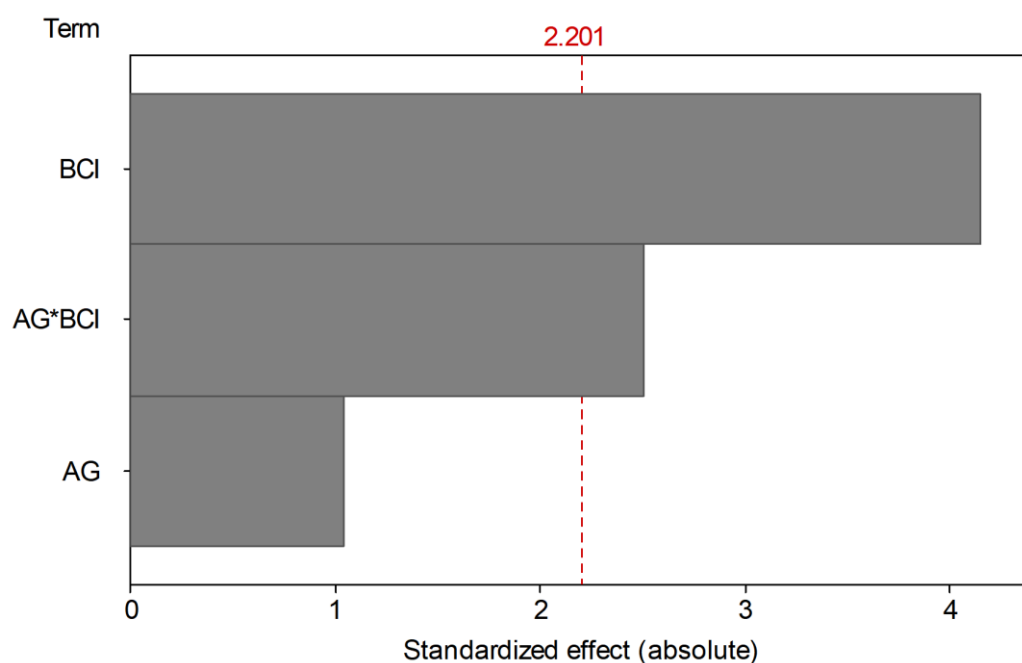

**Figure S16.** Pareto chart of the standardized effect (absolute) of the significant terms on shoot dry weight (DW) under BCI S2 treatment. Terms are ordered from the largest to the smallest effect: BCI S2, Arabic gum (AG), and AG\*BCI interaction effect. The dashed reference line indicates the statistical significance of effects. Significance at  $P < 0.05$ .

**Table S7.** Shoot dry weight (DW; % DW) response optimization under each BCI treatment. Peat (PT; -1 = black peat and 1 = white peat), other organics (OO; -1 = coir pith and 1 = wood fiber), composted materials (CM; -1 = composted bark and 1 = green waste compost), inorganic materials (IM; -1 = perlite and 1 = sand), Arabic gum (AG; -1 = 1 kg.m<sup>-3</sup> and 1 = 5 kg.m<sup>-3</sup>), and bacterial inoculum (BCI; -1 = C and 1 = S1-5 or PGPR). n.s. = no significant effect of any control factor.

| BCI  | Goal   | Solution                         | Fit  | SE fit | 95 % CI      |
|------|--------|----------------------------------|------|--------|--------------|
| PGPR | Max DW | PT 1; OO 1; CM -1; AG -1; BCI -1 | 6.70 | 0.10   | (6.38; 7.01) |
| S1   | Max DW | BCI 1                            | 6.61 | 0.22   | (6.13; 7.09) |
| S2   | Max DW | AG -1; BCI -1                    | 5.91 | 0.20   | (5.46; 6.35) |
| S3   | Max DW | n.s.                             | /    | /      | /            |
| S4   | Max DW | n.s.                             | /    | /      | /            |
| S5   | Max DW | OO 1; CM -1                      | 6.08 | 0.16   | (5.73; 6.43) |



132      **Effect of bacterial community inoculum and substratum on total phenolic content**

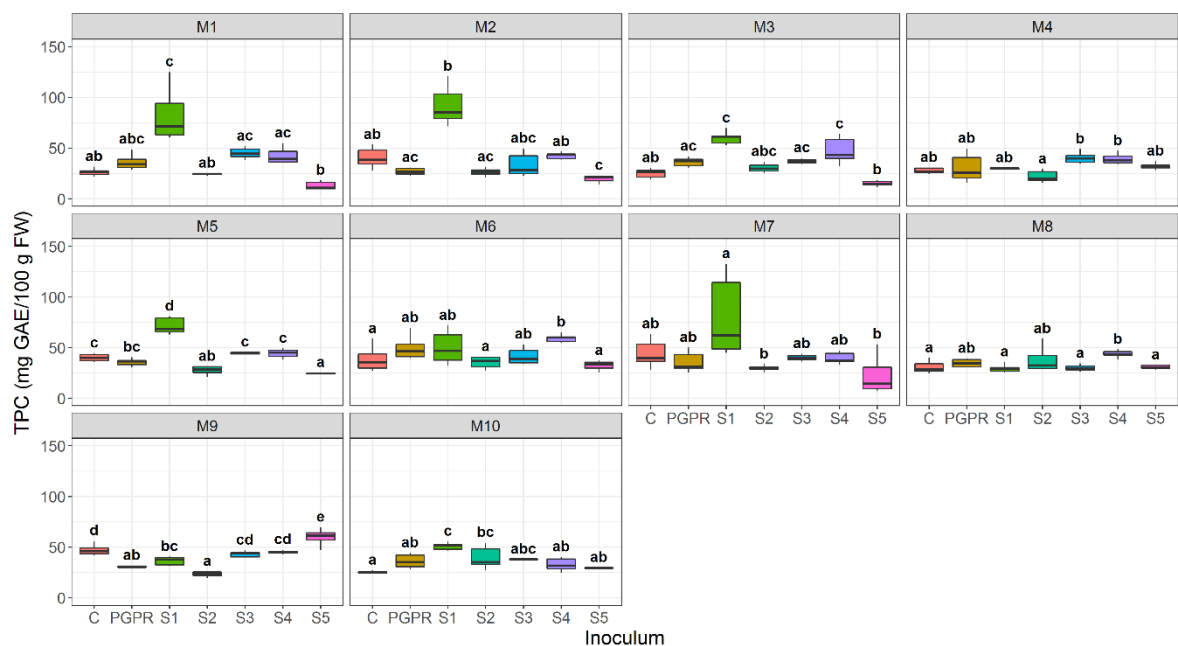

**Figure S17.** Boxplot of total phenolic content (TPC; mg GAE/100 g FW) grouped per substratum. Letters show comparison of BCI means per plant growing medium at the 95 % confidence level. S indicates the bacterial community inoculum, M indicates the plant growing medium, C indicates the negative control treatment without addition of inoculum, and PGPR indicates the positive control treatment with a *Bacillus* sp. inoculum. Number of plants  $\geq 3$ .

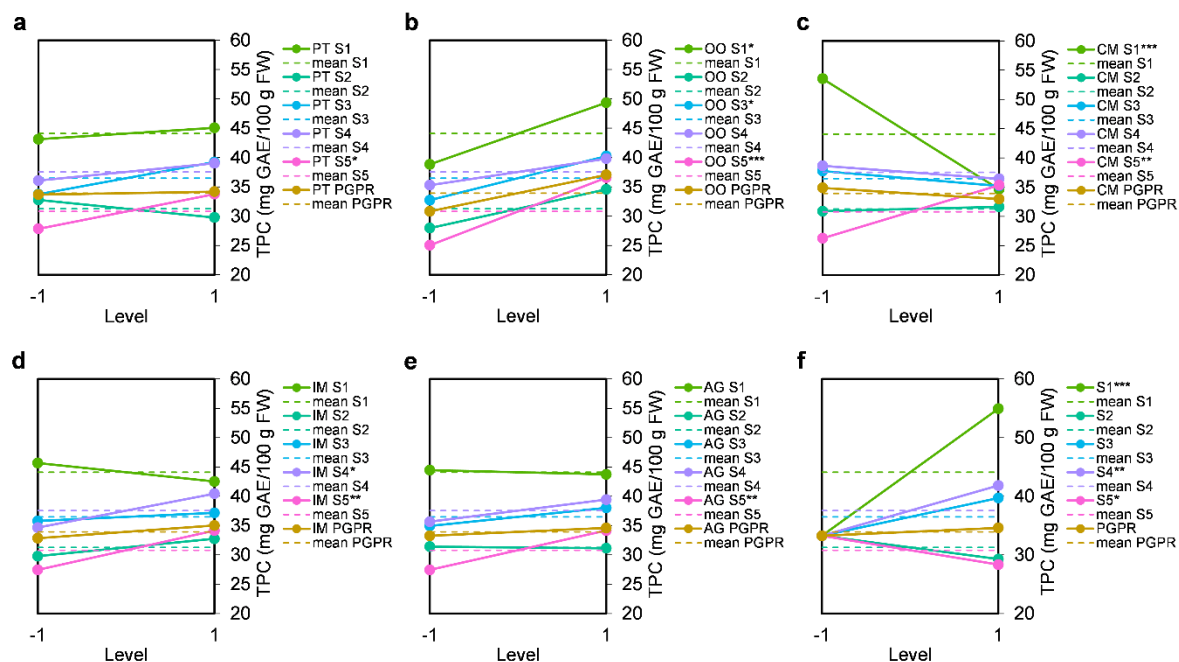

**Figure S18.** Main effects of substratum constituents on total phenolic content (TPC; mg GAE/100 g FW) under different bacterial treatments (S1–5 and positive control PGPR). (a) Peat (PT; -1 = black peat and 1 = white peat); (b) Other organics (OO; -1 = coir pith and 1 = wood fiber); (c) Composted materials (CM; -1 = composted bark and 1 = green waste compost); (d) Inorganic materials (IM; -1 = perlite and 1 = sand); (e) Arabic gum (AG; -1 = 1 kg.m<sup>-3</sup> and 1 = 5 kg.m<sup>-3</sup>); (f) Bacterial inoculum (BCI; -1 = C and 1 = S1–5 or PGPR). Dashed lines indicate mean levels of total phenolic content for each bacterial treatment. Asterisks indicate level of significance: P < 0.05 (\*), P < 0.01 (\*\*) and P < 0.001 (\*\*\*).

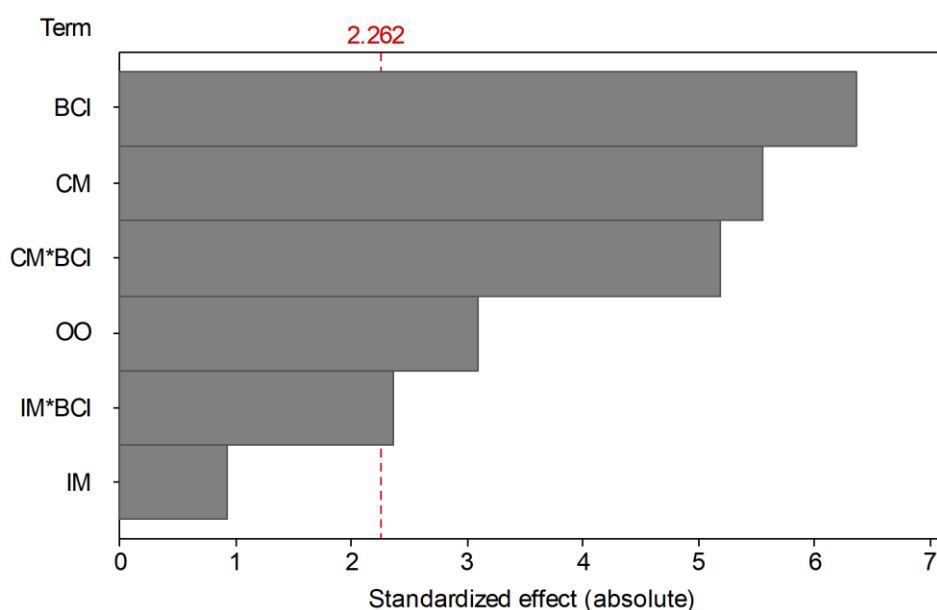

**Figure S19.** Pareto chart of the standardized effect (absolute) of the significant terms on total phenolic content (TPC) under BCI S1 treatment. Terms are ordered from the largest to the smallest effect: BCI S1, composted materials (CM), CM\*BCI interaction effect, other organics (OO), inorganic materials (IM), and IM\*BCI interaction effect. The dashed reference line indicates the statistical significance of effects. Significance at  $P < 0.05$ .

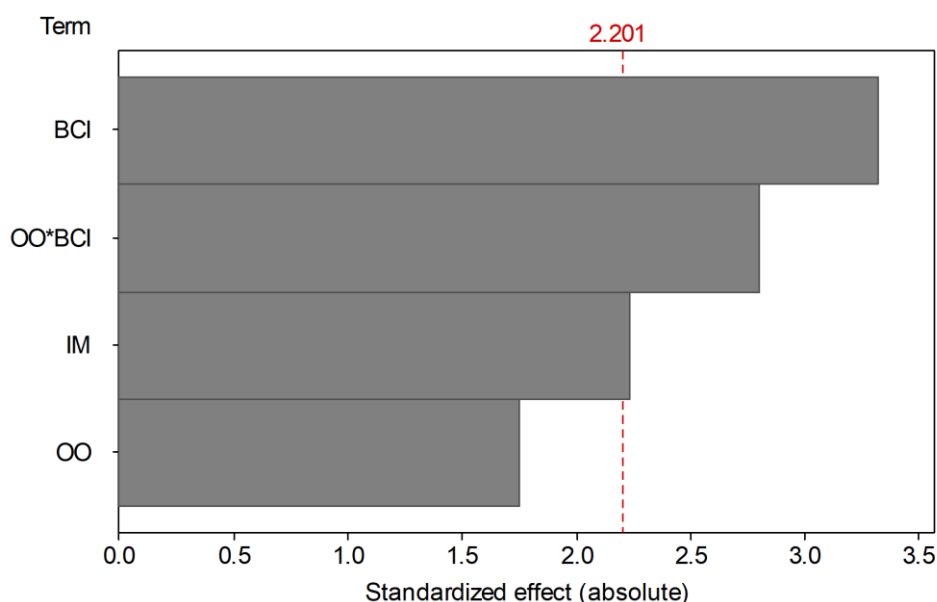

**Figure S20.** Pareto chart of the standardized effect (absolute) of the significant terms on total phenolic content (TPC) under BCI S4 treatment. Terms are ordered from the largest to the smallest effect: BCI S4, inorganic materials (IM), other organics (OO), and OO\*BCI interaction effect. The dashed reference line indicates the statistical significance of effects. Significance at  $P < 0.05$ .

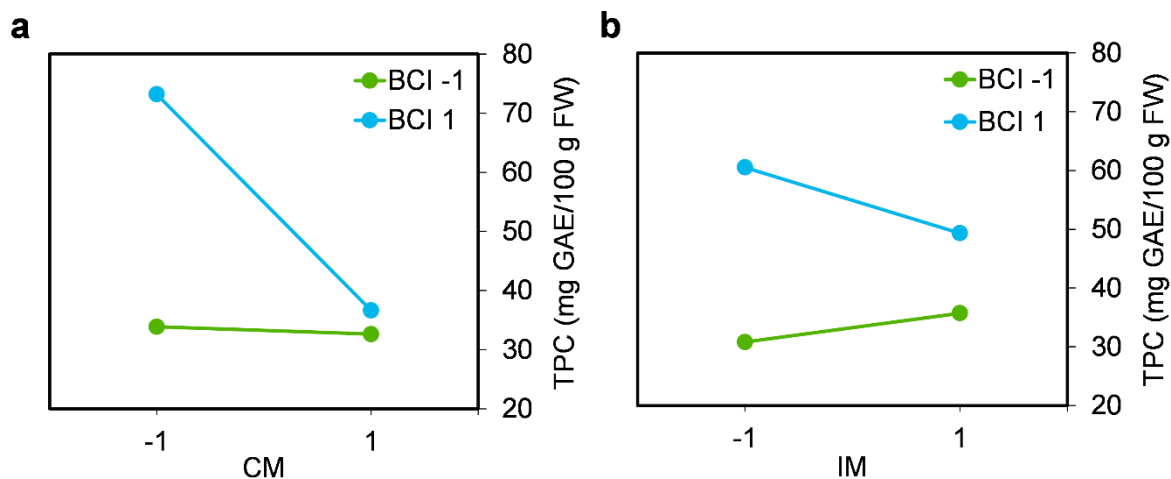

**Figure S21.** Interaction effects between substratum raw material groups on total phenolic content (TPC; mg GAE/100 g FW) under BCI S1 treatment. (a) Composted materials (CM; -1 = composted bark and 1 = green waste compost) and BCI (-1 = C and 1 = S1) ( $P = 0.001$ ); (b) Inorganic materials (IM; -1 = perlite and 1 = sand) and BCI ( $P = 0.042$ ).

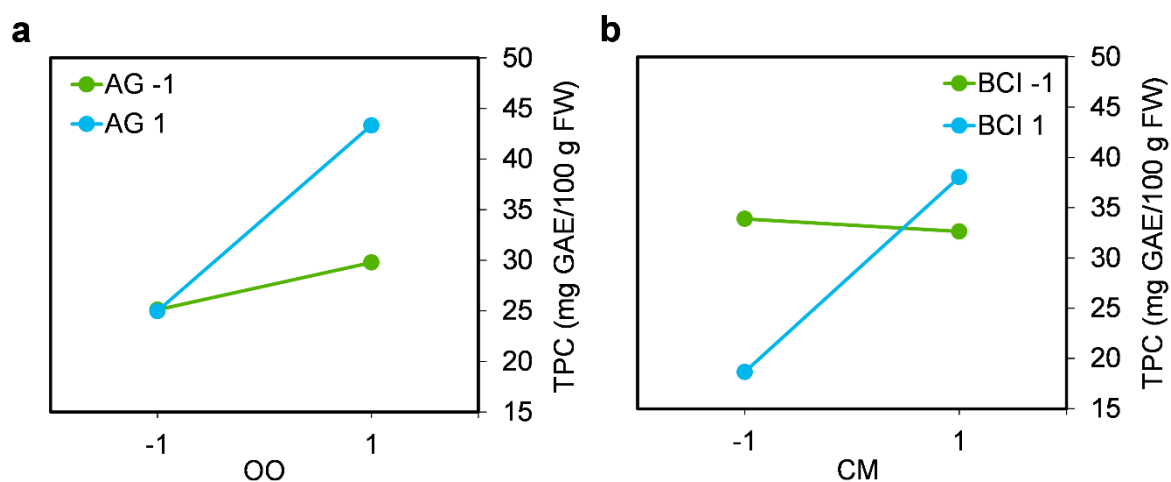

**Figure S22.** Interaction effects between substratum raw material groups on total phenolic content (TPC; mg GAE/100 g FW) under BCI S5 treatment. (a) Other organics (OO; -1 = coir pith and 1 = wood fiber) and Arabic gum (AG; -1 = 1 kg.m<sup>-3</sup> and 1 = 5 kg.m<sup>-3</sup>) ( $P = 0.006$ ); (b) Composted materials (CM; -1 = composted bark and 1 = green waste compost) and BCI (-1 = C and 1 = S5) ( $P = 0.001$ ).

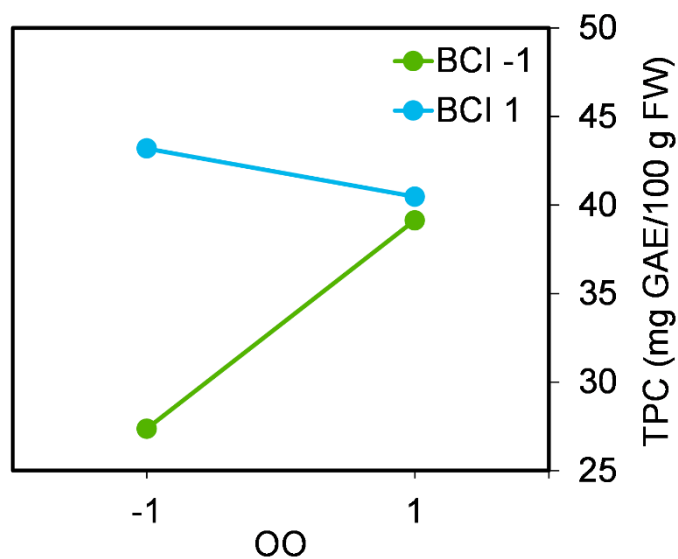

**Figure S23.** Interaction effect between other organics (OO; -1 = coir pith and 1 = wood fiber) and BCI (-1 = C and 1 = S4) on total phenolic content (TPC; mg GAE/100 g FW) under BCI S4 treatment (P = 0.017)

**Table S8.** Total phenolic content (TPC; mg GAE/100 g FW) response optimization under each BCI treatment. Peat (PT; -1 = black peat and 1 = white peat), other organics (OO; -1 = coir pith and 1 = wood fiber), composted materials (CM; -1 = composted bark and 1 = green waste compost), inorganic materials (IM; -1 = perlite and 1 = sand), Arabic gum (AG; -1 = 1 kg.m<sup>-3</sup> and 1 = 5 kg.m<sup>-3</sup>), and bacterial inoculum (BCI; -1 = C and 1 = S1–5 or PGPR). n.s. = no significant effect of any control factor.

| BCI  | Goal    | Solution                            | Fit   | SE fit | 95 % CI        |
|------|---------|-------------------------------------|-------|--------|----------------|
| PGPR | Max TPC | n.s.                                | /     | /      | /              |
| S1   | Max TPC | OO 1; CM -1; IM -1; BCI 1           | 84.05 | 4.50   | (73.87; 94.23) |
| S2   | Max TPC | n.s.                                | /     | /      | /              |
| S3   | Max TPC | OO 1                                | 40.24 | 2.47   | (34.95; 45.53) |
| S4   | Max TPC | OO -1; IM 1, BCI 1                  | 46.08 | 2.89   | (39.72; 52.44) |
| S5   | Max TPC | PT 1; OO 1; CM 1; IM 1; AG 1; BCI 1 | 56.88 | 2.61   | (50.71; 63.05) |

178      **Effect of bacterial community inoculum and substratum on nitrate content**

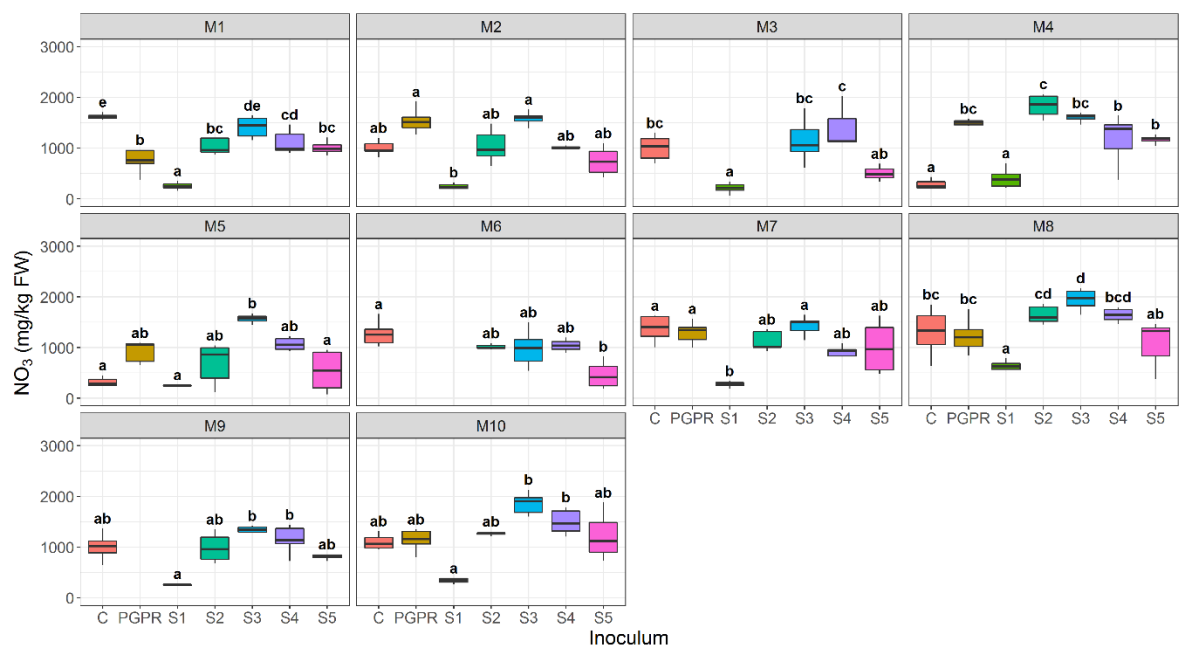

**Figure S24.** Boxplot of nitrate content (NO<sub>3</sub>; mg/kg FW) grouped per substratum. Letters show comparison of BCI means per plant growing medium at the 95 % confidence level. S indicates the bacterial community inoculum, M indicates the plant growing medium, C indicates the negative control treatment without addition of inoculum, and PGPR indicates the positive control treatment with a *Bacillus* sp. inoculum. Number of plants ≥ 3.

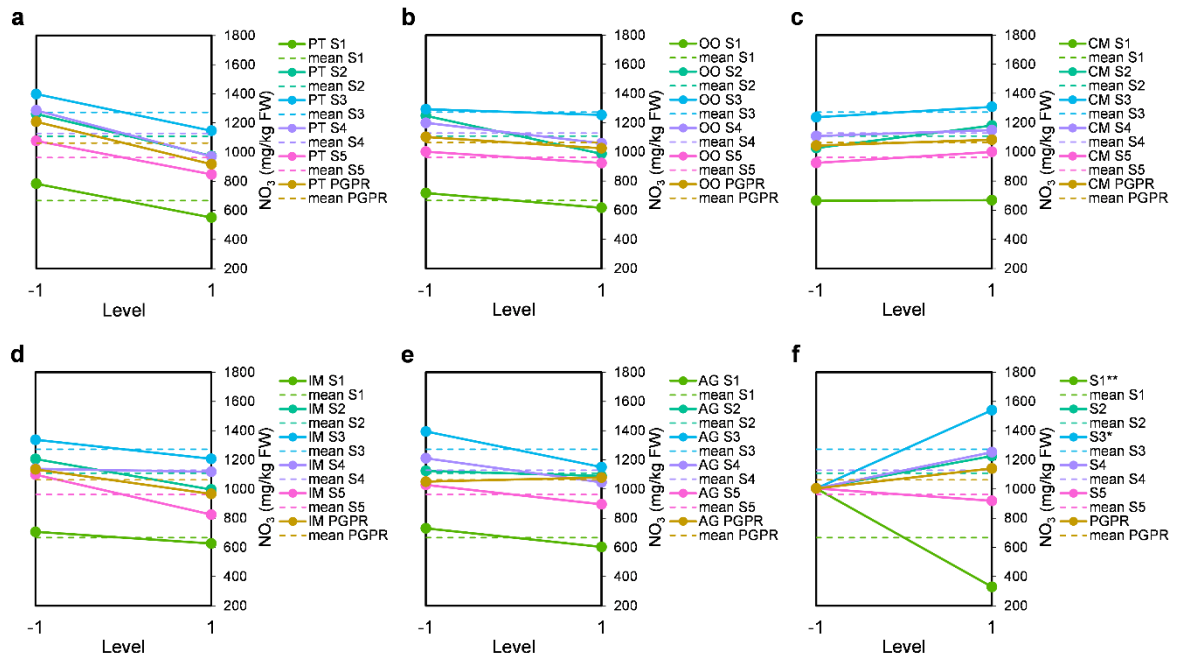

**Figure S25.** Main effects of substratum constituents on nitrate content ( $\text{NO}_3$ ; mg/kg FW) under different bacterial treatments (S1–5 and positive control PGPR). (a) Peat (PT; -1 = black peat and 1 = white peat); (b) Other organics (OO; -1 = coir pith and 1 = wood fiber); (c) Composted materials (CM; -1 = composted bark and 1 = green waste compost); (d) Inorganic materials (IM; -1 = perlite and 1 = sand); (e) Arabic gum (AG; -1 =  $1 \text{ kg.m}^{-3}$  and 1 =  $5 \text{ kg.m}^{-3}$ ); (f) Bacterial inoculum (BCI; -1 = C and 1 = S1–5 or PGPR). Dashed lines indicate mean levels of  $\text{NO}_3$  for each bacterial treatment. Asterisks indicate level of significance:  $P < 0.05$  (\*),  $P < 0.01$  (\*\*) and  $P < 0.001$  (\*\*\*).

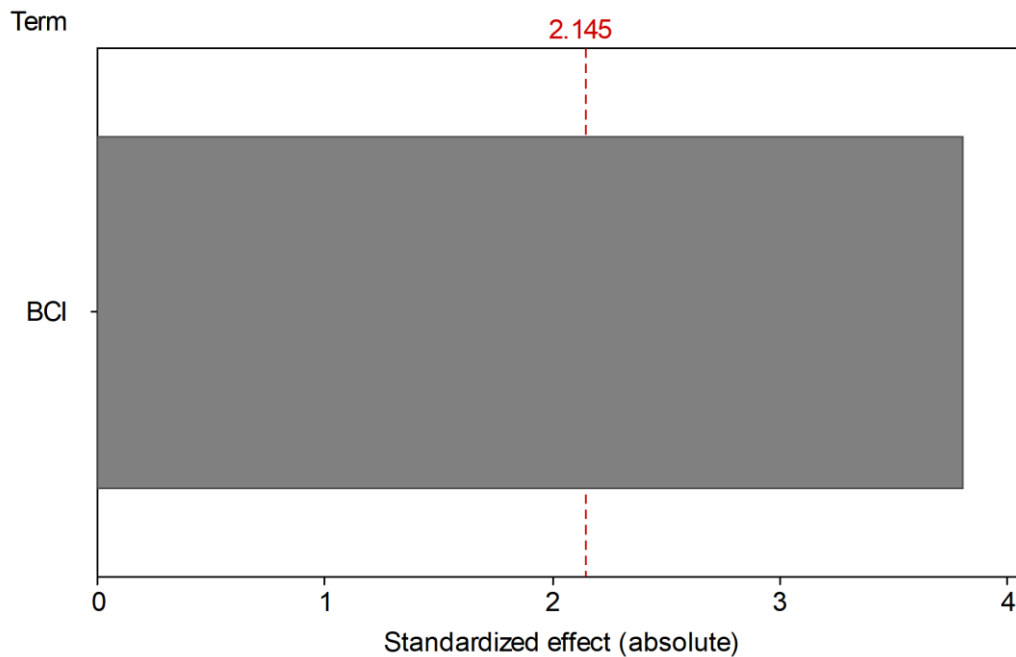

**Figure S26.** Pareto chart of the standardized effect (absolute) of the significant terms on  $\text{NO}_3$ -content under BCI S1 treatment. Terms are ordered from the largest to the smallest effect: BCI S1. The dashed reference line indicates the statistical significance of effects. Significance at  $P < 0.05$ .

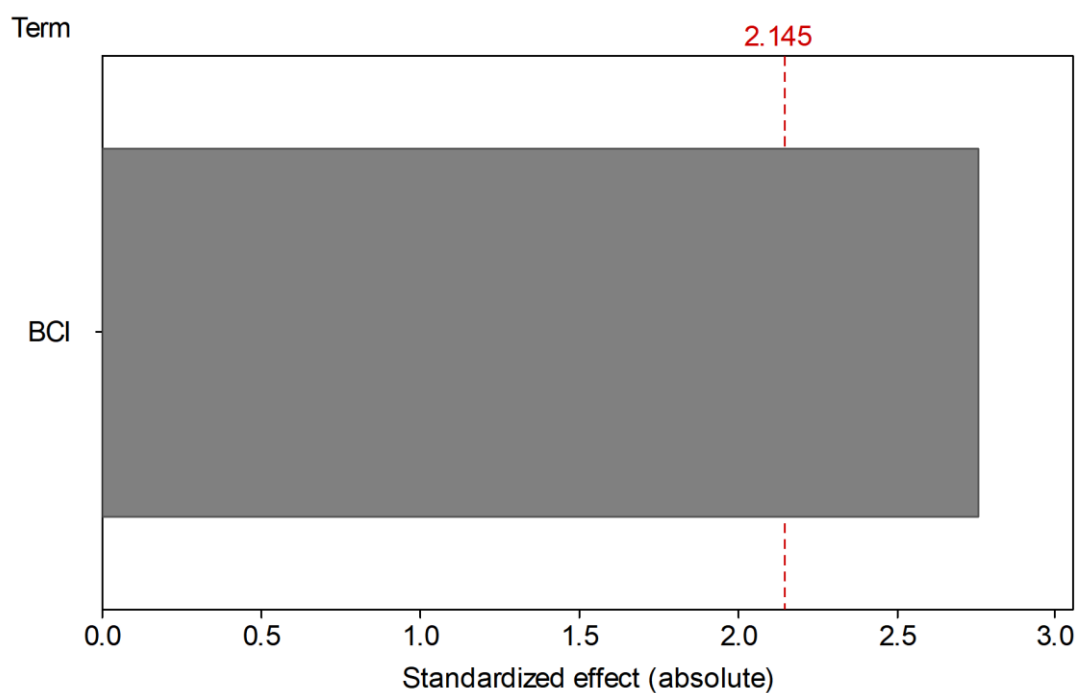

**Figure S27.** Pareto chart of the standardized effect (absolute) of the significant terms on NO<sub>3</sub>-content under BCI S3 treatment. Terms are ordered from the largest to the smallest effect: BCI S3. The dashed reference line indicates the statistical significance of effects. Significance at P < 0.05.

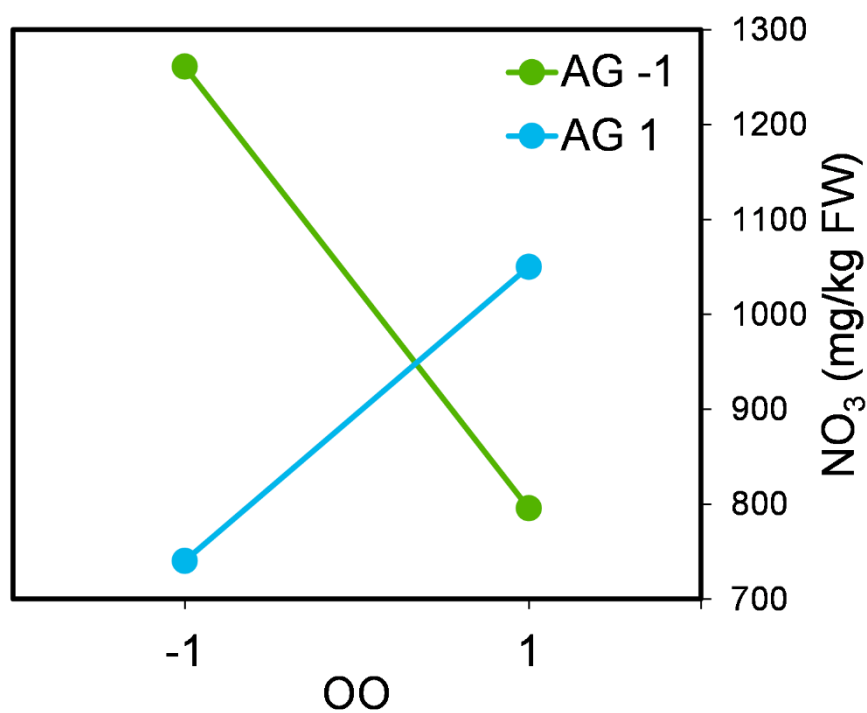

**Figure S28.** Interaction effect between other organics (OO; -1 = coir pith and 1 = wood fiber) and Arabic gum (AG; -1 = 1 kg.m<sup>-3</sup> and 1 = 5 kg.m<sup>-3</sup>) on NO<sub>3</sub>-content (mg/kg FW) under BCI S5 treatment (P = 0.047).



**Table S9.** NO<sub>3</sub>-content (mg/kg FW) response optimization under each BCI treatment. Peat (PT; -1 = black peat and 1 = white peat), other organics (OO; -1 = coir pith and 1 = wood fiber), composted materials (CM; -1 = composted bark and 1 = green waste compost), inorganic materials (IM; -1 = perlite and 1 = sand), Arabic gum (AG; -1 = 1 kg.m<sup>-3</sup> and 1 = 5 kg.m<sup>-3</sup>), and bacterial inoculum (BCI; -1 = C and 1 = S1-5 or PGPR). n.s. = no significant effect of any control factor.

| BCI  | Goal                | Solution    | Fit  | SE fit | 95 % CI     |
|------|---------------------|-------------|------|--------|-------------|
| PGPR | Min NO <sub>3</sub> | n.s.        | /    | /      | /           |
| S1   | Min NO <sub>3</sub> | BCI 1       | 329  | 125    | (61; 598)   |
| S2   | Min NO <sub>3</sub> | n.s.        | /    | /      | /           |
| S3   | Min NO <sub>3</sub> | BCI -1      | 1004 | 137    | (709; 1299) |
| S4   | Min NO <sub>3</sub> | n.s.        | /    | /      | /           |
| S5   | Min NO <sub>3</sub> | OO -1; AG 1 | 740  | 175    | (358; 1122) |

211 Effect of bacterial community inoculum and substratum on chlorophylls

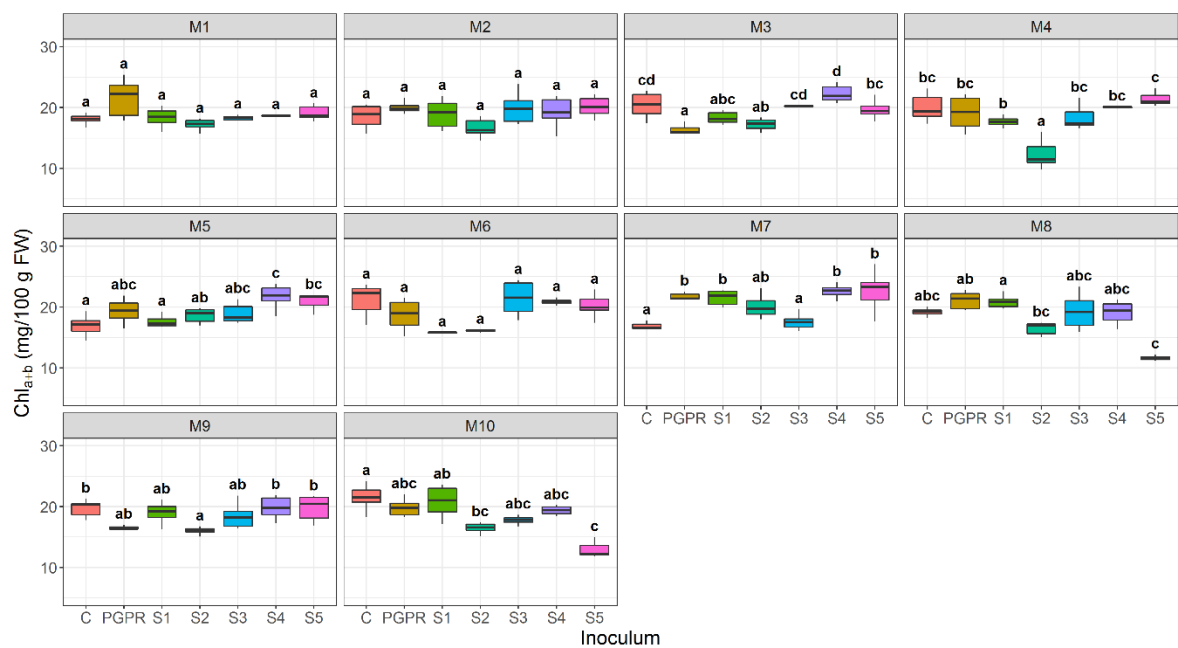

**Figure S29.** Boxplot of chlorophyll a+b (Chl<sub>a+b</sub>; mg/100 g FW) grouped per substratum. Letters show comparison of BCI means per plant growing medium at the 95 % confidence level. S indicates the bacterial community inoculum, M indicates the plant growing medium, C indicates the negative control treatment without addition of inoculum, and PGPR indicates the positive control treatment with a *Bacillus* sp. inoculum. Number of plants ≥ 3.

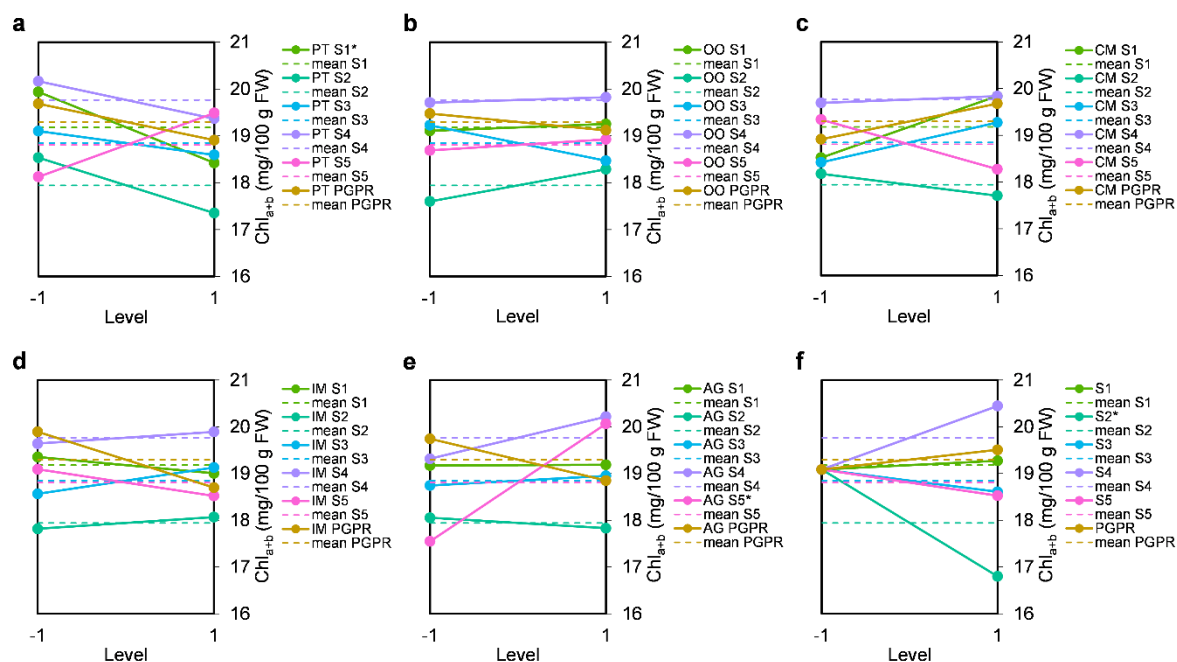

**Figure S30.** Main effects of substratum constituents on chlorophyll a+b content ( $\text{Chl}_{a+b}$ ; mg/100 g FW) under different bacterial treatments (S1–5 and positive control PGPR). (a) Peat (PT; -1 = black peat and 1 = white peat); (b) Other organics (OO; -1 = coir pith and 1 = wood fiber); (c) Composted materials (CM; -1 = composted bark and 1 = green waste compost); (d) Inorganic materials (IM; -1 = perlite and 1 = sand); (e) Arabic gum (AG; -1 =  $1 \text{ kg.m}^{-3}$  and 1 =  $5 \text{ kg.m}^{-3}$ ); (f) Bacterial inoculum (BCI; -1 = C and 1 = S1–5 or PGPR). Dashed lines indicate mean levels of  $\text{Chl}_{a+b}$  for each bacterial treatment. Asterisks indicate level of significance:  $P < 0.05$  (\*),  $P < 0.01$  (\*\*) and  $P < 0.001$  (\*\*\*).

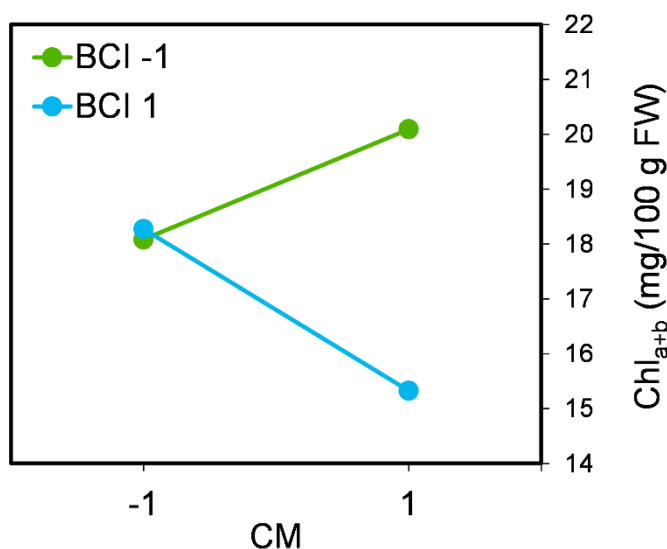

**Figure S31.** Interaction effect between composted materials (CM; -1 = composted bark and 1 = green waste compost) and BCI (-1 = C and 1 = S2) on chlorophyll a+b content ( $\text{Chl}_{a+b}$ ; mg/100 g FW) under BCI S2 treatment ( $P = 0.008$ ).

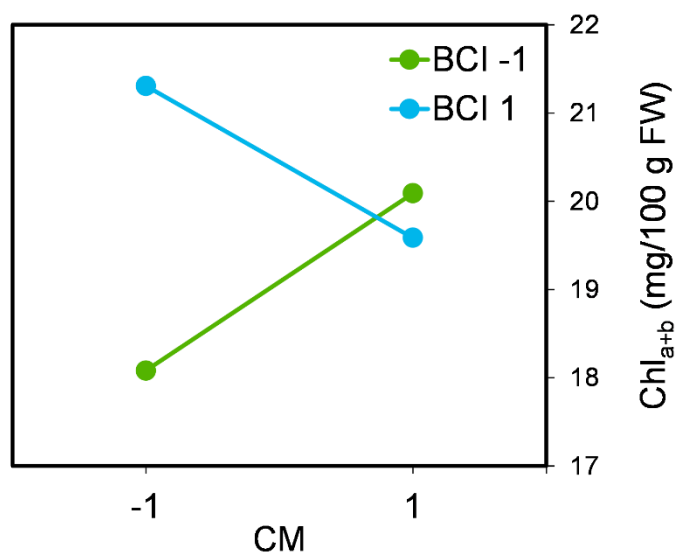

**Figure S32.** Interaction effect between composted materials (CM; -1 = composted bark and 1 = green waste compost) and BCI (-1 = C and 1 = S4) on chlorophyll a+b content (Chl<sub>a+b</sub>; mg/100 g FW) under BCI S4 treatment (P = 0.016).

**Table S10.** Chlorophyll a+b content (Chl<sub>a+b</sub>; mg/100 g FW) response optimization under each BCI treatment. Peat (PT; -1 = black peat and 1 = white peat), other organics (OO; -1 = coir pith and 1 = wood fiber), composted materials (CM; -1 = composted bark and 1 = green waste compost), inorganic materials (IM; -1 = perlite and 1 = sand), Arabic gum (AG; -1 = 1 kg.m<sup>-3</sup> and 1 = 5 kg.m<sup>-3</sup>), and bacterial inoculum (BCI; -1 = C and 1 = S1–5 or PGPR). n.s. = no significant effect of any control factor.

| BCI  | Goal                   | Solution                   | Fit   | SE fit | 95 % CI        |
|------|------------------------|----------------------------|-------|--------|----------------|
| PGPR | Max Chl <sub>a+b</sub> | CM -1; IM -1; AG -1; BCI 1 | 21.89 | 0.78   | (19.72; 24.06) |
| S1   | Max Chl <sub>a+b</sub> | PT -1                      | 19.94 | 0.49   | (18.88; 21.00) |
| S2   | Max Chl <sub>a+b</sub> | CM 1; BCI -1               | 20.09 | 0.78   | (18.39; 21.79) |
| S3   | Max Chl <sub>a+b</sub> | n.s.                       | /     | /      | /              |
| S4   | Max Chl <sub>a+b</sub> | CM -1; BCI 1               | 21.31 | 0.67   | (19.85; 22.76) |
| S5   | Max Chl <sub>a+b</sub> | PT 1, CM -1; AG 1, BCI 1   | 24.72 | 1.06   | (22.27; 27.17) |

240      **Effect of bacterial community inoculum and substratum on carotenoids**

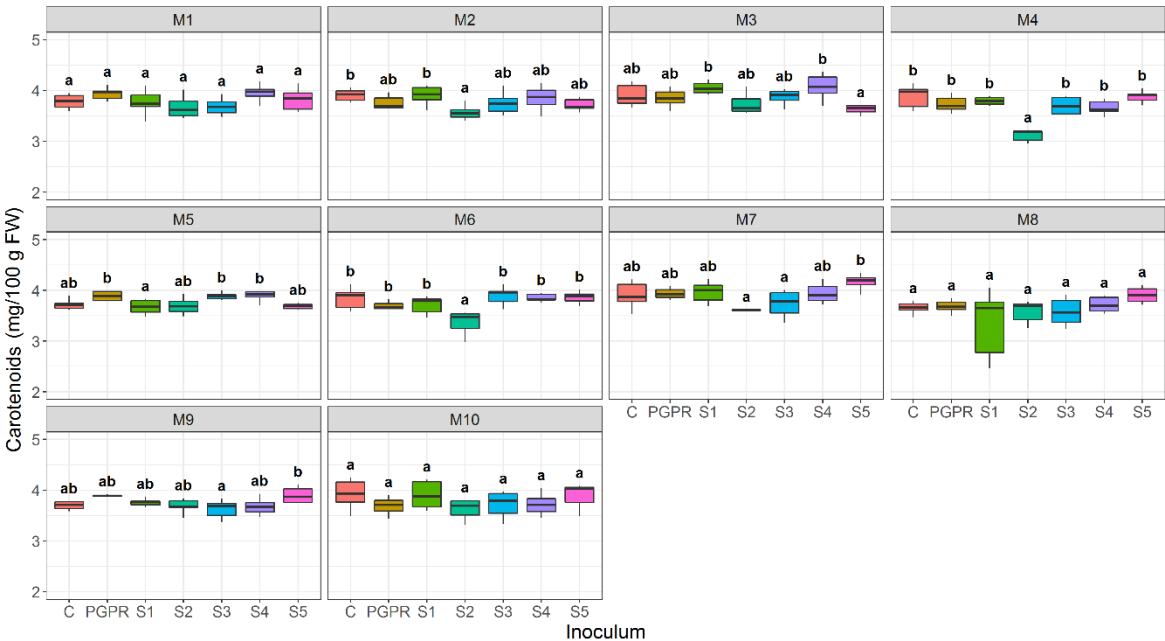

241  
242      **Figure S33.** Boxplot of carotenoid content (mg/100 g FW) grouped per substratum. Letters show  
243 comparison of BCI means per plant growing medium at the 95 % confidence level. S indicates the  
244 bacterial community inoculum, M indicates the plant growing medium, C indicates the negative  
245 control treatment without addition of inoculum, and PGPR indicates the positive control treatment  
246 with a *Bacillus* sp. inoculum. Number of plants  $\geq 3$ .

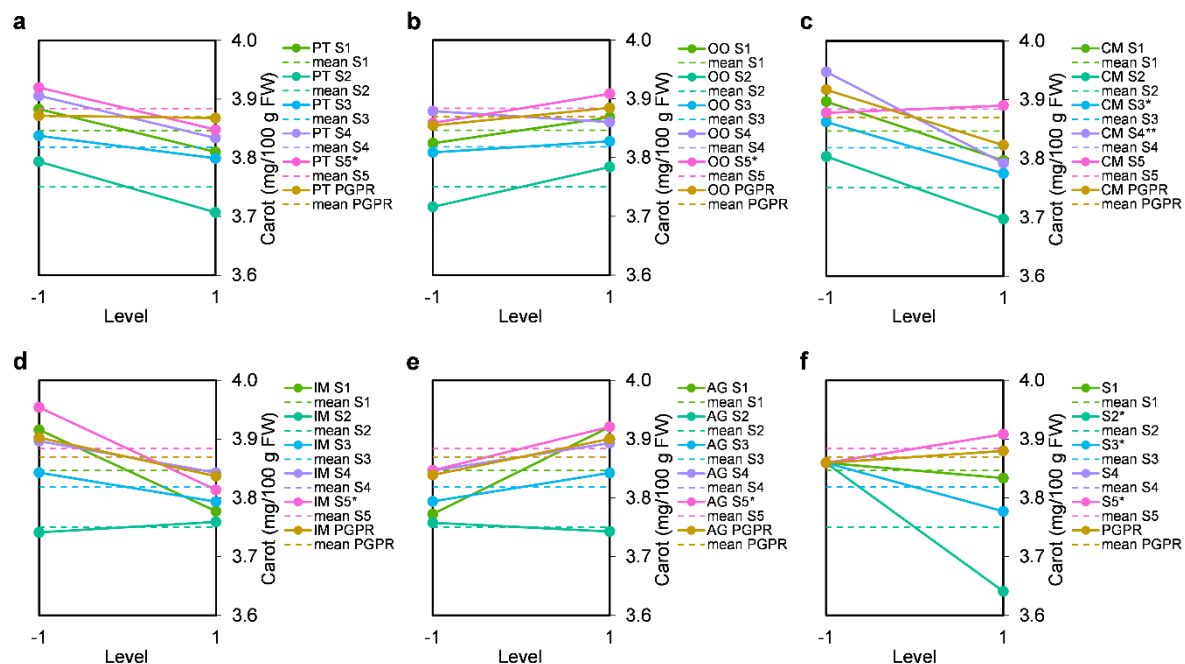

**Figure S34.** Main effects of substratum constituents on carotenoid content (mg/100 g FW) under different bacterial treatments (S1–5 and positive control PGPR). (a) Peat (PT; -1 = black peat and 1 = white peat); (b) Other organics (OO; -1 = coir pith and 1 = wood fiber); (c) Composted materials (CM; -1 = composted bark and 1 = green waste compost); (d) Inorganic materials (IM; -1 = perlite and 1 = sand); (e) Arabic gum (AG; -1 = 1 kg.m<sup>-3</sup> and 1 = 5 kg.m<sup>-3</sup>); (f) Bacterial inoculum (BCI; -1 = C and 1 = S1–5 or PGPR). Dashed lines indicate mean levels of carotenoids for each bacterial treatment. Asterisks indicate level of significance: P < 0.05 (\*), P < 0.01 (\*\*) and P < 0.001 (\*\*\*).

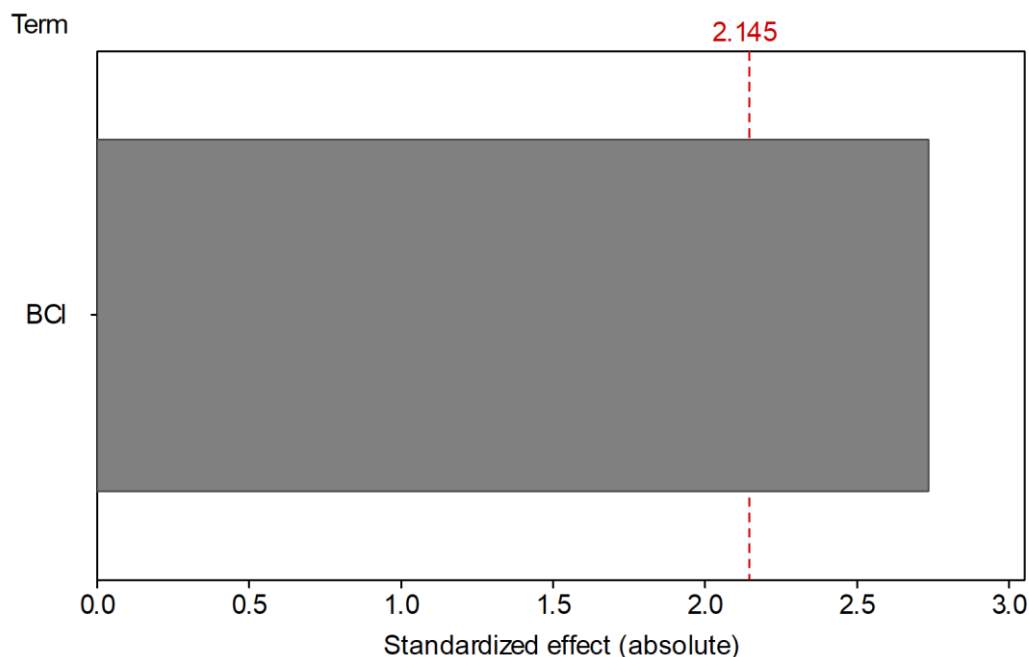

**Figure S35.** Pareto chart of the standardized effect (absolute) of the significant terms on carotenoid content under BCI S2 treatment. Terms are ordered from the largest to the smallest effect: BCI S2. The dashed reference line indicates the statistical significance of effects. Significance at P < 0.05.

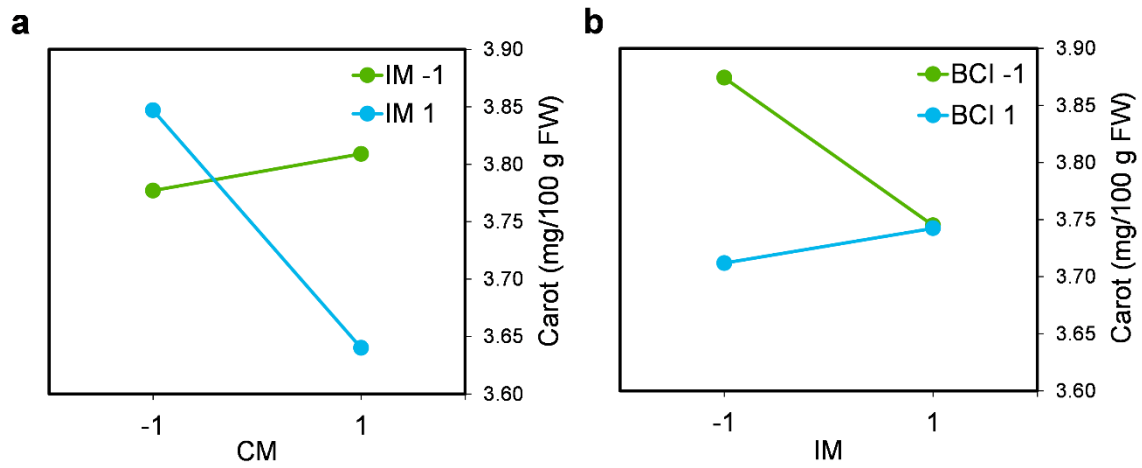

**Figure S36.** Interaction effects between substratum raw material groups on carotenoid content (mg/100 g FW) under BCI S3 treatment. (a) Composted materials (CM; -1 = composted bark and 1 = green waste compost) and inorganic materials (IM; -1 = perlite and 1 = sand) ( $P = 0.004$ ); (b) Inorganic materials and BCI (-1 = C and 1 = S3) ( $P = 0.030$ ).

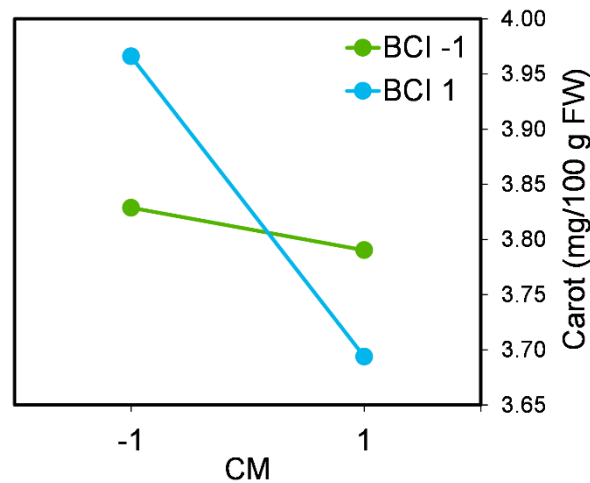

**Figure S37.** Interaction effect between composted materials (CM; -1 = composted bark and 1 = green waste compost) and BCI (-1 = C and 1 = S4) on carotenoid content (mg/100 g FW) under BCI S4 treatment ( $P = 0.025$ ).

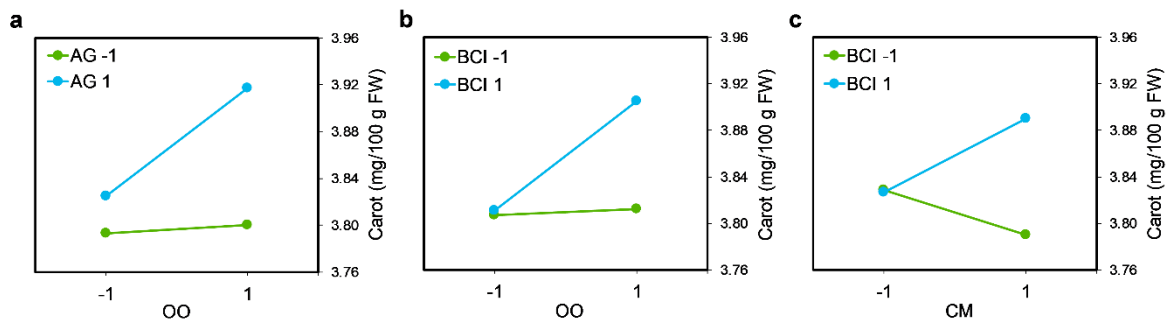

**Figure S38.** Interaction effects between substratum raw material groups on carotenoid content (mg/100 g FW) under BCI S5 treatment. (a) Other organics (OO; -1 = coir pith and 1 = wood fiber) and Arabic gum (AG; -1 = 1 kg.m<sup>-3</sup> and 1 = 5 kg.m<sup>-3</sup>) ( $P = 0.049$ ); (b) Other organics and BCI (-1 = C and 1 = S5) ( $P = 0.047$ ); (c) Composted materials (CM; -1 = composted bark and 1 = green waste compost) and BCI ( $P = 0.041$ ).

**Table S11.** Carotenoid content (mg/100 g FW) response optimization under each BCI treatment. Peat (PT; -1 = black peat and 1 = white peat), other organics (OO; -1 = coir pith and 1 = wood fiber), composted materials (CM; -1 = composted bark and 1 = green waste compost), inorganic materials (IM; -1 = perlite and 1 = sand), Arabic gum (AG; -1 = 1 kg.m<sup>-3</sup> and 1 = 5 kg.m<sup>-3</sup>), and bacterial inoculum (BCI; -1 = C and 1 = S1-5 or PGPR). n.s. = no significant effect of any control factor.

| BCI  | Goal      | Solution                              | Fit  | SE fit | 95 % CI      |
|------|-----------|---------------------------------------|------|--------|--------------|
| PGPR | Max Carot | n.s.                                  | /    | /      | /            |
| S1   | Max Carot | n.s.                                  | /    | /      | /            |
| S2   | Max Carot | BCI -1                                | 3.81 | 0.06   | (3.69; 3.93) |
| S3   | Max Carot | CM 1; IM -1; BCI -1                   | 3.89 | 0.04   | (3.80; 3.98) |
| S4   | Max Carot | CM -1; BCI 1                          | 3.97 | 0.05   | (3.87; 4.07) |
| S5   | Max Carot | PT -1, OO 1, CM 1, IM -1, AG 1, BCI 1 | 4.23 | 0.01   | (4.15; 4.31) |
